# Supplementary material for: An exhaustive inventory of coniferous trees in an agricultural landscape
Source: Biodivers Data J. 2015 Feb 23;(3):e4660. doi: 10.3897/BDJ.3.e4660 (PMC4339812; doi:10.3897/BDJ.3.e4660)
Supplement: Supplementary material 2 — An exhaustive inventory of coniferous trees in an agricultural landscape [file biodiversity_data_journal-3-e4660-s002.xls]

## Sheet: metadata
Regional Scope			Bounding Box	Longitude (EPSG 2154)	Latitude (EPSG 2154)	Longitude (EPSG 4326)	Latitude (EPSG 4326)
General Keywords	Ornamental trees; pine processionary moth; point pattern; trees outside forests; open-field landscape		lower left	570017.01063056453	6820055.4608164523	1.241456	48.467738
Begin Date	autumn 2009		lower right	592001.36005055474	6819872.1581092915	1.538854	48.470121
End Date	winter 2010		upper right	592184.85387388722	6841856.7000891836	1.535822	48.667878
			upper left	570200.12007769709	6842040.0006731432	1.237294	48.665486

## Sheet: Rousselet_et_al_trees
longitude_EPSG2154	latitude_EPSG2154	longitude_EPSG4326	latitude_EPSG4326
591618.837038	6820000.550271	1.533648	48.471212
591639.832278	6820031.30572	1.533924	48.471492
591708.935267	6820067.270756	1.53485	48.471827
591666.808722	6820091.85098	1.534274	48.472041
591602.881801	6820130.378567	1.5334	48.472377
591580.697585	6820146.0283	1.533096	48.472514
591527.357957	6820165.357815	1.532369	48.472679
591503.538349	6820183.67565	1.532042	48.47284
591453.581078	6820208.924985	1.53136	48.473059
591680.142268	6820243.324815	1.534416	48.473406
591692.123597	6820217.157715	1.534585	48.473173
591700.327435	6820174.075174	1.534707	48.472787
591701.154529	6820174.226591	1.534718	48.472788
591741.719429	6820131.621446	1.535277	48.472412
591740.749256	6820136.775263	1.535263	48.472458
591937.266186	6819884.171049	1.537984	48.470219
592000.142978	6820085.635279	1.538784	48.472041
591914.193814	6820317.655916	1.537564	48.474114
591860.283864	6820446.611835	1.536802	48.475265
591858.754762	6820477.773239	1.536774	48.475545
591872.2417	6820544.199537	1.536939	48.476144
591952.869777	6821686.286758	1.537744	48.48643
591980.572065	6821691.5798	1.538118	48.486483
591916.095145	6821652.076148	1.537255	48.486117
591902.07871	6821629.485387	1.537071	48.485911
591891.643102	6821611.584311	1.536934	48.485748
591889.309077	6821600.630069	1.536906	48.485649
591886.579392	6821577.354604	1.536874	48.48544
591862.931747	6821532.493468	1.536566	48.485032
591853.746982	6821511.900979	1.536447	48.484845
591845.222593	6821487.840441	1.536337	48.484627
591835.799922	6821470.800867	1.536214	48.484473
591841.166631	6821473.236877	1.536286	48.484495
591834.707687	6821448.653202	1.536205	48.484273
591833.49832	6821425.525629	1.536194	48.484065
591831.483102	6821427.091707	1.536167	48.484079
591830.705618	6821427.590987	1.536156	48.484083
591830.941834	6821420.952912	1.536161	48.484023
591845.557149	6821388.260853	1.536367	48.483732
591861.370709	6821351.009902	1.53659	48.483399
591862.299318	6821339.278728	1.536606	48.483294
591880.404668	6821930.751172	1.536702	48.488617
591627.12267	6821824.891985	1.533302	48.487623
591527.109808	6821660.35811	1.53199	48.486126
591561.296906	6821618.2248	1.532463	48.485753
591587.684466	6821565.399735	1.532833	48.485282
591629.408158	6821513.389363	1.533411	48.484821
591647.898005	6821526.270108	1.533658	48.48494
591584.843796	6821430.199692	1.532829	48.484066
591591.907372	6821378.243429	1.532938	48.483599
591622.569683	6821368.365584	1.533355	48.483516
591665.12461	6821404.057482	1.533922	48.483844
591721.689159	6821442.920782	1.534677	48.484203
591758.614258	6821468.078606	1.53517	48.484435
591779.341028	6821495.362307	1.535444	48.484684
591795.386813	6821507.411769	1.535658	48.484795
591805.182153	6821520.154702	1.535787	48.484911
591769.401107	6821506.216826	1.535307	48.48478
591789.787607	6821470.733793	1.535592	48.484464
591790.511816	6821469.034141	1.535602	48.484449
591801.877732	6821372.705776	1.53578	48.483585
591784.354006	6821328.756751	1.535554	48.483186
591770.964538	6821299.622927	1.53538	48.482922
591771.36501	6821294.825529	1.535386	48.482879
591639.303282	6821313.67884	1.533595	48.483027
591641.299869	6821305.096399	1.533624	48.48295
591649.031153	6821248.693047	1.533743	48.482444
591626.491371	6821234.957953	1.533441	48.482316
591600.220803	6821222.499789	1.533089	48.4822
591572.602229	6821246.190767	1.53271	48.482408
591572.367544	6821250.565089	1.532705	48.482448
591547.903132	6821372.594324	1.532344	48.483541
591522.066344	6821358.454578	1.531998	48.48341
591505.417618	6821214.413326	1.531809	48.482111
590741.764996	6821063.130168	1.521515	48.480623
590757.95022	6821049.689414	1.521738	48.480504
590797.585659	6820983.611081	1.522291	48.479917
590797.165378	6821005.50891	1.522279	48.480114
590871.601231	6820933.375343	1.523305	48.479477
591013.832729	6820916.955355	1.525233	48.479354
590951.330003	6820958.6974	1.524377	48.479718
590965.803994	6820997.546539	1.524563	48.48007
590968.243504	6821038.235787	1.524586	48.480437
590967.561515	6821059.094642	1.524571	48.480624
590966.398164	6821064.808143	1.524554	48.480675
590996.45559	6821076.893161	1.524957	48.480789
591034.807848	6821067.044632	1.525479	48.480707
591035.017362	6821035.793177	1.52549	48.480426
591164.560106	6821053.020055	1.527238	48.480603
591252.785303	6821127.174508	1.528413	48.481284
591267.276353	6821141.453469	1.528605	48.481415
591267.416342	6821173.23577	1.528599	48.481701
591107.457251	6821177.262865	1.526434	48.481711
591096.11836	6821226.662093	1.526268	48.482153
590989.082814	6821170.406086	1.524834	48.481629
590932.60348	6821158.72232	1.524073	48.481514
591052.23077	6821267.496772	1.525664	48.482513
590855.406741	6821001.661269	1.523068	48.480089
590855.394221	6821001.661503	1.523068	48.480089
590854.903544	6821001.587298	1.523061	48.480088
590724.79165	6821091.712302	1.521278	48.480877
590718.368101	6821101.366245	1.521189	48.480962
590743.589436	6821175.118504	1.521512	48.48163
590677.484959	6821195.668015	1.520612	48.481804
590699.325041	6821190.44105	1.520909	48.48176
590814.821972	6821246.474763	1.522457	48.482284
590768.640036	6821405.220331	1.521792	48.483704
590742.588185	6821405.504318	1.52144	48.483702
590604.025745	6821402.183599	1.519566	48.483649
591102.85714	6821386.551284	1.526319	48.483592
591037.420131	6821385.385777	1.525434	48.483571
591088.641759	6821386.359564	1.526126	48.483588
591132.287238	6821389.019326	1.526716	48.483619
591254.430187	6821383.276303	1.52837	48.483588
591147.126046	6821444.545288	1.526903	48.484121
591107.644469	6821529.191743	1.526347	48.484876
591117.834688	6821568.32516	1.526475	48.48523
591160.421226	6821598.648451	1.527044	48.48551
591392.616419	6821756.760814	1.530146	48.486971
591472.298448	6821732.353315	1.53123	48.486764
591461.850548	6821827.068933	1.531065	48.487615
591486.557039	6821851.146062	1.531393	48.487835
591513.10963	6821882.570063	1.531745	48.488122
591439.604024	6821878.931295	1.530751	48.488077
591495.74922	6821955.348167	1.531491	48.488774
591493.352647	6821956.053645	1.531459	48.48878
591489.433086	6821949.14693	1.531407	48.488717
591142.920762	6821793.545633	1.526758	48.48726
591229.236968	6821851.58668	1.527911	48.487796
591362.986771	6822136.315278	1.529649	48.49038
591028.11125	6821752.999112	1.525215	48.486876
591024.392964	6821748.287836	1.525166	48.486833
590574.445923	6821822.099398	1.519059	48.487421
590471.753662	6821887.306508	1.517653	48.48799
590301.396194	6821902.684775	1.515344	48.4881
590244.110518	6821869.580546	1.514577	48.487792
590164.040598	6821908.243334	1.513484	48.488126
590155.831194	6821923.969312	1.513369	48.488266
590060.97879	6821803.03475	1.512116	48.487163
590047.938193	6822151.342818	1.511851	48.490293
589846.478856	6821956.006991	1.509175	48.488502
589751.163789	6821964.320867	1.507883	48.488561
589491.677087	6821716.190228	1.504436	48.486285
589476.853389	6821729.306192	1.504232	48.4864
589427.580474	6821750.962656	1.50356	48.486586
589449.285912	6821772.126465	1.503848	48.486781
589468.381076	6821784.68936	1.504103	48.486897
589493.260905	6821800.777719	1.504435	48.487046
589484.891281	6821805.988796	1.504321	48.487091
589307.088034	6821487.712093	1.501997	48.484198
589174.387442	6821214.081593	1.500272	48.481714
589145.291081	6821164.396441	1.499891	48.481262
589100.788172	6821127.864077	1.499298	48.480926
589083.236064	6821111.570145	1.499065	48.480777
588998.324421	6821035.951966	1.497936	48.480082
588998.234369	6821035.783821	1.497934	48.480081
588926.991029	6820870.153636	1.497013	48.478579
588731.390505	6821134.430779	1.494299	48.480922
588723.539662	6821184.074189	1.49418	48.481367
588727.032337	6821185.934699	1.494227	48.481385
588704.079948	6821148.370501	1.493926	48.481043
588663.719532	6821184.607006	1.49337	48.481362
588342.33133	6820972.489729	1.489077	48.479399
588810.882181	6821028.242438	1.495402	48.479981
588810.91535	6821027.386338	1.495402	48.479973
588788.599122	6821007.91353	1.495106	48.479794
588785.73535	6821005.23803	1.495067	48.479769
588764.234931	6820978.204969	1.494784	48.479523
588721.436967	6820994.892	1.4942	48.479665
588845.149895	6820774.859121	1.495931	48.477707
588693.61777	6820717.491442	1.493896	48.477165
588713.530487	6820669.341387	1.494177	48.476736
588700.383961	6820625.898506	1.494011	48.476343
588691.878416	6820605.202204	1.493901	48.476155
588544.383465	6820417.276591	1.491954	48.47444
588510.213629	6820390.841681	1.491499	48.474196
588483.277899	6820474.163593	1.491113	48.474941
588474.96347	6820479.075429	1.490999	48.474984
588388.011781	6820550.703978	1.489805	48.475613
588356.101801	6820557.5405	1.489371	48.475669
588305.842412	6820529.919877	1.488698	48.475412
588268.082628	6820527.977564	1.488188	48.475388
588219.558306	6820535.021813	1.48753	48.475443
588217.061432	6820523.065315	1.487499	48.475335
588296.661629	6820484.061026	1.488586	48.474998
588154.228712	6820509.016089	1.486653	48.475198
588098.485378	6820492.768573	1.485903	48.475042
587846.29138	6820423.197103	1.48251	48.474373
587846.69456	6820422.902139	1.482515	48.47437
587827.64496	6820415.701901	1.482259	48.474302
588018.525156	6820272.063475	1.484879	48.473043
588018.974596	6820271.588513	1.484885	48.473039
587807.484248	6820346.206796	1.482005	48.473673
587708.959804	6820453.39544	1.480644	48.47462
587749.983082	6820390.441144	1.481215	48.474061
587717.597212	6820420.529985	1.480769	48.474326
587762.975076	6820346.855809	1.481402	48.473671
587790.36771	6820304.543926	1.481784	48.473296
589672.828511	6820197.778555	1.507275	48.472658
589632.601653	6820146.062742	1.506744	48.472186
589587.42147	6820175.172335	1.506126	48.47244
589587.826185	6820174.942319	1.506131	48.472438
589651.769646	6820272.654365	1.506971	48.473328
589593.75011	6820284.990179	1.506183	48.473429
589573.97326	6820294.925803	1.505913	48.473515
589540.933149	6820298.160761	1.505465	48.473539
589496.071996	6820309.016254	1.504856	48.473629
589494.516877	6820309.027174	1.504835	48.473628
589456.874914	6820315.305273	1.504324	48.473679
589413.81619	6820325.457097	1.503739	48.473763
589378.459428	6820331.664604	1.503259	48.473812
589372.340282	6820316.450229	1.50318	48.473674
589395.507997	6820278.166886	1.503503	48.473334
589389.547254	6820248.103988	1.50343	48.473063
589388.603075	6820238.832248	1.50342	48.472979
589388.661216	6820235.68107	1.503422	48.472951
589388.710688	6820235.680132	1.503422	48.472951
589360.201405	6820177.221536	1.503052	48.47242
589316.585536	6820175.683011	1.502462	48.472399
589313.196199	6820177.331602	1.502416	48.472413
589304.545703	6820141.720718	1.502308	48.472091
589303.142271	6820057.279032	1.502311	48.471332
589276.877497	6820035.887398	1.501961	48.471135
589307.579473	6820027.896098	1.502378	48.471068
589483.740529	6820243.224811	1.504706	48.473035
589485.012394	6820243.957359	1.504723	48.473042
589488.369921	6820249.14081	1.504767	48.473089
589534.359481	6820379.702339	1.505356	48.474271
589532.078733	6820381.972189	1.505324	48.474291
589454.739762	6820487.818737	1.504251	48.47523
589447.344306	6820570.049371	1.50413	48.475968
589525.363894	6820536.227778	1.505194	48.475677
589494.28308	6820776.973198	1.504712	48.477837
589512.985305	6820783.348478	1.504963	48.477898
589469.051218	6820932.222413	1.504331	48.479229
589469.012488	6820932.139762	1.50433	48.479229
589353.278694	6820706.538634	1.502822	48.47718
589389.106223	6820665.797665	1.503317	48.476819
589390.131634	6820660.725736	1.503332	48.476774
589348.768693	6820531.436188	1.502806	48.475604
589345.468757	6820525.368457	1.502763	48.475549
589348.518671	6820542.756522	1.5028	48.475706
589317.407141	6820532.284226	1.502382	48.475606
589207.252995	6820449.489232	1.500913	48.474843
589214.973445	6820415.216757	1.501026	48.474536
589240.778907	6820416.076474	1.501375	48.474548
589296.927984	6820417.602062	1.502134	48.474571
589319.811769	6820463.705785	1.502432	48.47499
589274.066614	6820358.002079	1.50184	48.474031
589304.121735	6820327.44433	1.502254	48.473762
589338.875667	6820308.400425	1.502729	48.473596
589258.233603	6820326.591734	1.501634	48.473746
589252.838704	6820312.994363	1.501564	48.473623
589247.145108	6820248.074919	1.501504	48.473038
589245.893337	6820240.569374	1.501489	48.47297
589242.962313	6820233.373649	1.501451	48.472905
589233.881486	6820119.297065	1.501358	48.471878
589190.148689	6820119.78145	1.500766	48.471874
589189.116739	6819988.748697	1.500786	48.470696
589275.814513	6820108.865744	1.501928	48.471791
588243.618594	6819941.958447	1.488009	48.470113
588185.491296	6819996.110644	1.487209	48.47059
587946.854461	6820083.192436	1.483958	48.471332
587944.160109	6820082.292971	1.483922	48.471323
587981.937384	6820104.671407	1.484427	48.471531
588018.914935	6820142.868371	1.484917	48.471881
588019.002809	6820142.931539	1.484919	48.471882
588095.94035	6820209.80945	1.485942	48.472496
588140.964079	6820227.874539	1.486546	48.472667
588238.230369	6820194.818805	1.487871	48.472386
588207.022652	6820251.012546	1.487434	48.472886
588271.435277	6820290.80107	1.488295	48.473255
588271.418704	6820290.579028	1.488295	48.473253
588278.402251	6820292.848033	1.488389	48.473275
588299.269742	6820307.939569	1.488667	48.473414
588346.601746	6820332.407374	1.489301	48.473642
588027.147978	6820532.512643	1.484928	48.475387
588030.048754	6820550.96534	1.484962	48.475553
588042.732802	6820620.419404	1.485116	48.47618
588030.432935	6820635.565883	1.484945	48.476314
588088.227304	6820746.850817	1.485698	48.477325
588090.895638	6820693.115145	1.485748	48.476843
588110.828025	6820677.905808	1.486022	48.476709
587995.401675	6820695.691713	1.484456	48.476849
587975.157353	6820720.774668	1.484175	48.477071
587974.853975	6820720.780493	1.484171	48.477071
587924.773554	6820800.899343	1.483473	48.477783
587924.850705	6820801.046101	1.483474	48.477785
587912.056397	6820820.742214	1.483296	48.47796
587907.3395	6820832.908227	1.483229	48.478068
587907.541658	6820845.365786	1.483228	48.47818
587891.034526	6820965.581521	1.482974	48.479259
587890.31993	6820976.104875	1.482961	48.479353
587890.144326	6820977.609182	1.482959	48.479367
587889.946735	6820979.262153	1.482956	48.479382
587892.064207	6821022.387212	1.482973	48.47977
587891.285318	6821023.131027	1.482962	48.479776
587891.191116	6821023.710357	1.482961	48.479782
587876.25615	6821057.385412	1.48275	48.480082
587631.38007	6821254.404676	1.479386	48.481812
587596.796544	6821569.199601	1.478836	48.484637
587522.789583	6821624.814275	1.47782	48.485124
587539.366797	6821647.27134	1.478039	48.485329
587529.237192	6821680.017923	1.477893	48.485622
587216.564732	6821564.227634	1.473693	48.484526
587209.243392	6821546.35477	1.473598	48.484364
587117.674095	6821615.297674	1.472341	48.484968
587109.509378	6821632.929614	1.472226	48.485126
587026.413827	6821710.329699	1.471082	48.485807
586999.261214	6821516.841495	1.470765	48.484062
587339.022759	6821523.698723	1.47536	48.484183
587366.520727	6821519.06644	1.475733	48.484146
587201.76851	6821419.926001	1.47353	48.483226
587139.211176	6821396.394987	1.47269	48.483003
587094.501035	6821368.958352	1.472092	48.482749
587124.130442	6821411.066131	1.472482	48.483133
587268.250093	6821371.478741	1.474442	48.482802
587280.910177	6821317.444257	1.474628	48.482318
587329.209665	6821329.939469	1.475278	48.482439
587340.986135	6821328.603336	1.475438	48.482429
587394.160002	6821324.034459	1.476158	48.482397
587418.187521	6821330.216896	1.476482	48.482456
587419.165088	6821330.794085	1.476495	48.482462
587445.905662	6821320.259532	1.476859	48.482372
587514.45292	6821319.348284	1.477787	48.482375
587329.329453	6821217.128896	1.475309	48.481424
587336.87151	6821117.773087	1.475437	48.480532
587451.107462	6821219.608636	1.476956	48.481467
587452.299913	6821214.943843	1.476973	48.481426
587459.883014	6821158.398128	1.477091	48.480918
587478.022014	6821058.081551	1.477362	48.480019
587445.410921	6820952.567208	1.476949	48.479064
587413.488035	6820947.00642	1.476518	48.479009
587439.900363	6820949.869296	1.476875	48.479039
587505.927076	6820868.777683	1.477789	48.478321
587514.52954	6820829.38063	1.477916	48.477968
587526.704937	6820765.757735	1.478097	48.477398
587650.138431	6820456.63393	1.479847	48.474639
587545.674984	6820492.037258	1.478425	48.47494
587527.981037	6820504.073803	1.478183	48.475045
587524.937196	6820555.432798	1.478128	48.475506
587533.901575	6820562.424947	1.478248	48.475571
587758.890909	6820502.403983	1.481307	48.47507
587709.939886	6820595.761066	1.48062	48.475901
587712.677536	6820615.353277	1.480652	48.476078
587709.523116	6820634.956963	1.480604	48.476254
587720.530403	6820681.480925	1.480741	48.476674
587740.150808	6820668.138577	1.48101	48.476557
587778.560746	6820640.123553	1.481537	48.476312
587831.553126	6820593.869795	1.482266	48.475905
587941.869368	6820514.785898	1.483779	48.475213
587957.939265	6820533.328479	1.483991	48.475382
587963.225912	6820548.239344	1.484059	48.475517
587694.497153	6820815.867545	1.480354	48.477878
587686.822454	6820876.484964	1.480234	48.478422
587687.420096	6820877.600704	1.480242	48.478432
587685.239545	6820889.850889	1.480209	48.478542
587678.059233	6820940.097449	1.480099	48.478993
587679.035055	6820940.582064	1.480112	48.478997
587676.674656	6820956.041419	1.480076	48.479136
587672.329846	6820976.560626	1.480012	48.47932
587668.043416	6821006.5414	1.479946	48.479589
587664.441025	6821033.111836	1.479891	48.479827
587565.542599	6820987.34203	1.478565	48.479398
587625.729198	6820953.603601	1.479388	48.479105
587651.924548	6819976.513021	1.479997	48.470321
587615.467193	6819920.454764	1.479518	48.469811
587656.117848	6819980.916535	1.480052	48.470362
587610.704302	6820193.115732	1.479383	48.472262
587546.488075	6820208.834046	1.47851	48.472393
587545.749451	6820214.889048	1.478498	48.472447
587565.231577	6820328.083831	1.478732	48.473468
587467.103501	6820187.961669	1.477442	48.472191
587436.624487	6820227.913352	1.477019	48.472545
587392.741698	6820241.480836	1.476422	48.47266
587366.939556	6820246.629831	1.476071	48.472701
587331.959284	6820258.478697	1.475595	48.472802
587234.002193	6820307.449392	1.474257	48.473225
587137.827999	6820380.917937	1.472937	48.473869
587144.176018	6820372.731518	1.473025	48.473797
587080.902577	6820419.406634	1.472157	48.474206
586981.587082	6820483.973224	1.470797	48.474769
586954.107903	6820594.802509	1.470396	48.475761
586903.081387	6820559.28093	1.469715	48.475433
586892.464506	6820559.7832	1.469571	48.475435
586710.21738	6820538.587303	1.467112	48.475213
586687.121173	6820604.502477	1.466782	48.475802
586667.19048	6820624.420248	1.466507	48.475978
586466.513633	6820598.287269	1.463799	48.475707
586500.570998	6820692.091065	1.464235	48.476557
586299.001214	6820829.605174	1.461472	48.477759
586617.254694	6820590.266614	1.46584	48.475662
586595.483838	6820563.629617	1.465553	48.475418
586949.775569	6819926.573996	1.470512	48.46975
586947.317889	6819926.380717	1.470479	48.469748
586943.133082	6819936.841657	1.47042	48.469841
586941.847245	6819951.712159	1.470399	48.469975
586963.179351	6820011.34219	1.470672	48.470515
586959.471294	6820011.861825	1.470621	48.470519
587018.314509	6820051.126881	1.471407	48.470882
587020.665358	6820050.599588	1.471439	48.470878
586850.941193	6819999.147349	1.469157	48.470386
586850.502537	6819998.893346	1.469151	48.470383
586849.350076	6819998.906427	1.469135	48.470383
586717.49577	6819999.994484	1.467351	48.47037
586702.986645	6820025.408997	1.467148	48.470596
586678.550156	6820069.012039	1.466806	48.470984
586656.700834	6820104.773086	1.466502	48.471302
586654.833182	6820163.024466	1.466461	48.471825
586790.061789	6820084.682757	1.468311	48.471144
586876.59105	6820074.002236	1.469484	48.471063
586848.51897	6820136.612693	1.469088	48.471622
586780.487649	6820301.536785	1.468124	48.473093
586828.134676	6820333.580503	1.46876	48.47339
586836.569406	6820349.297152	1.46887	48.473533
586848.601479	6820373.826116	1.469027	48.473755
586848.445617	6820373.455449	1.469025	48.473752
586915.773051	6820397.273911	1.469929	48.473978
586919.655164	6820395.512446	1.469982	48.473963
587061.557202	6820282.686741	1.471931	48.472973
587057.34828	6820282.295688	1.471874	48.472968
587086.981698	6820270.202726	1.472278	48.472865
587086.613728	6820270.395146	1.472273	48.472866
587191.87836	6820244.625404	1.473704	48.472653
587198.271599	6820260.894679	1.473786	48.4728
587170.178674	6820194.031883	1.473424	48.472194
587167.332701	6820159.327754	1.473394	48.471881
587180.563797	6820107.472132	1.473587	48.471417
587202.28454	6820108.170214	1.47388	48.471427
587238.093202	6820109.016146	1.474365	48.471441
587258.963747	6820160.651228	1.474633	48.471909
587259.956191	6820160.063801	1.474647	48.471904
587260.069643	6820159.845426	1.474649	48.471902
587265.754976	6820104.503925	1.47474	48.471405
587271.834404	6820107.413043	1.474821	48.471433
587276.289528	6820108.67967	1.474881	48.471445
587355.321961	6820096.128218	1.475954	48.471346
587362.958587	6820130.273594	1.476048	48.471654
587362.929973	6820130.39768	1.476048	48.471655
587340.812378	6820119.082817	1.475751	48.47155
587405.598981	6820117.795356	1.476628	48.471549
587384.595157	6820003.324208	1.476374	48.470516
587322.529811	6820003.432095	1.475534	48.470506
587330.065194	6820003.110568	1.475636	48.470505
587233.361998	6820031.899388	1.474321	48.470747
587232.959095	6820030.603899	1.474316	48.470735
587202.869249	6819921.052656	1.473937	48.469744
586917.148268	6820135.690016	1.470016	48.471625
587060.284607	6820114.159485	1.471958	48.471457
587116.15886	6820110.227839	1.472715	48.471431
587102.23904	6820195.969758	1.472504	48.4722
587019.445482	6820207.803797	1.471381	48.472292
587004.210834	6820163.145017	1.471187	48.471887
586936.906003	6820164.924277	1.470276	48.471892
586936.127545	6820175.918382	1.470263	48.47199
586782.04445	6820380.175805	1.468125	48.473801
586330.844562	6820555.545334	1.461975	48.475299
586344.679494	6820529.386232	1.462169	48.475066
586354.763339	6820503.748037	1.462312	48.474837
586377.301067	6820522.602027	1.462612	48.475011
586456.792523	6820510.440045	1.463691	48.474916
586505.721298	6820341.408224	1.464397	48.473404
586539.361095	6820406.677759	1.464835	48.473997
586596.138035	6820326.595936	1.465624	48.473286
586655.170863	6820308.663862	1.466427	48.473135
586679.001385	6820355.495843	1.466737	48.473561
586741.170565	6820306.32387	1.467591	48.473129
586690.92364	6820292.957101	1.466915	48.473
586685.2159	6820254.627403	1.466848	48.472655
586681.973257	6820251.345703	1.466805	48.472625
586633.536802	6820218.299354	1.466158	48.472319
586544.448553	6820588.979492	1.464856	48.475637
586731.817168	6821824.675405	1.467066	48.486784
586687.135648	6821897.848071	1.466442	48.487435
586683.673578	6821906.497907	1.466393	48.487512
586467.762296	6821454.024737	1.463591	48.483404
586368.055625	6821311.248197	1.462279	48.482103
586246.888931	6820758.22065	1.460786	48.477107
585029.829479	6819981.921872	1.444529	48.469911
584940.18169	6820088.649389	1.443288	48.470855
571111.236555	6821294.76954	1.255885	48.479103
586802.585581	6824225.070474	1.467393	48.508386
586878.895144	6824161.280768	1.468443	48.507826
586931.154929	6824057.886151	1.469177	48.506905
587007.784601	6823770.392114	1.47029	48.504333
587006.714918	6823789.023605	1.47027	48.5045
587002.645242	6823826.046038	1.470206	48.504832
587043.482555	6823801.526648	1.470765	48.504619
586982.519307	6823705.283849	1.469965	48.503743
586985.880128	6823661.718477	1.470022	48.503351
587048.628821	6823648.368488	1.470875	48.503242
587127.094341	6823600.084674	1.471949	48.502822
587127.241111	6823599.979916	1.471951	48.502821
587109.262746	6823648.936329	1.471695	48.503258
587077.431399	6823714.853887	1.471247	48.503845
586989.43699	6824002.489832	1.469981	48.506417
587021.038033	6824018.168916	1.470404	48.506564
587106.617986	6824074.382291	1.471548	48.507084
587107.751611	6824075.685276	1.471563	48.507096
587130.611527	6824103.693272	1.471865	48.507352
587131.402203	6824103.585316	1.471876	48.507351
587112.616759	6824197.765819	1.471597	48.508195
587083.186218	6824210.973437	1.471195	48.508309
587003.330795	6824244.93325	1.470105	48.5086
586986.552159	6824250.50254	1.469876	48.508647
586943.979294	6824255.577439	1.469299	48.508685
586909.595361	6824299.114563	1.468822	48.509071
586881.862936	6824364.700859	1.468429	48.509656
586881.025242	6824364.615191	1.468418	48.509655
586871.695673	6824368.87599	1.468291	48.509692
586968.895612	6824408.193762	1.469596	48.510062
587028.95225	6824447.763183	1.470399	48.510429
586884.526503	6824232.266994	1.4685	48.508465
586855.563865	6824041.041053	1.468158	48.50674
587171.015143	6825402.0599	1.472072	48.519037
587830.474215	6826350.96083	1.480753	48.527686
588082.726458	6826788.790923	1.484055	48.531667
588144.076816	6826960.647829	1.484841	48.533223
588121.840084	6826962.686792	1.484539	48.533238
588258.44149	6826828.747819	1.486424	48.532057
588387.1432	6826750.003049	1.488187	48.531371
588345.188062	6826813.879197	1.487602	48.531938
588307.965966	6826933.180206	1.487067	48.533005
588355.681896	6826823.706437	1.487742	48.532028
588244.616246	6827108.41748	1.486164	48.53457
588167.782695	6827087.122961	1.485129	48.534365
588120.462879	6827066.028796	1.484493	48.534167
588033.077491	6827185.309792	1.483279	48.535225
588039.942521	6827201.485074	1.483368	48.535371
588101.914024	6827215.317321	1.484203	48.535507
587914.062006	6827025.483238	1.481709	48.533767
587953.095871	6826971.26817	1.482252	48.533286
587987.23845	6826920.473677	1.482727	48.532835
587655.093144	6827062.110514	1.478192	48.534051
587654.123631	6827062.231121	1.478179	48.534052
587448.761078	6827352.906271	1.475322	48.536631
587470.683676	6827337.889863	1.475623	48.5365
587410.560522	6827397.985508	1.474793	48.53703
587308.335018	6827375.796864	1.473414	48.536812
587316.03265	6827395.880719	1.473513	48.536994
587264.967647	6827418.944766	1.472815	48.537193
587300.619425	6827308.369948	1.473327	48.536205
587395.281222	6827476.845669	1.474565	48.537736
587363.912346	6827517.021566	1.47413	48.538092
587341.978311	6827538.431811	1.473827	48.538281
587317.275968	6827554.938639	1.473488	48.538425
587324.106769	6827549.410977	1.473582	48.538377
587412.528873	6827611.365233	1.474764	48.538949
587474.696882	6827661.140146	1.475593	48.539408
587496.205973	6827630.541056	1.475892	48.539136
587545.620502	6827582.623769	1.476574	48.538714
587542.97494	6827502.28761	1.476559	48.537991
587541.278424	6827448.358282	1.47655	48.537505
587534.78179	6827470.581773	1.476456	48.537704
587487.768182	6827488.395568	1.475815	48.537856
587485.739163	6827488.75903	1.475787	48.537859
587769.813573	6827006.565523	1.47976	48.533572
587797.203352	6827011.480089	1.48013	48.533621
587828.818384	6827016.613048	1.480557	48.533672
587839.72164	6827020.986522	1.480703	48.533713
587863.234582	6827032.863299	1.481019	48.533824
587906.725977	6827088.802165	1.481593	48.534335
587894.690432	6827176.468426	1.481407	48.535121
587831.233931	6827275.915315	1.480522	48.536005
587828.526663	6827277.703145	1.480485	48.53602
587808.535402	6827283.146861	1.480213	48.536066
587839.898052	6827284.556924	1.480637	48.536084
587749.118591	6827342.518057	1.479392	48.53659
587729.276285	6827386.83393	1.479112	48.536985
587757.339004	6827416.823086	1.479484	48.537259
587663.828246	6827445.948554	1.47821	48.537505
587653.259893	6827455.053283	1.478065	48.537585
588995.982383	6827777.050387	1.496167	48.540713
589415.680433	6827749.95067	1.501858	48.540541
589701.788217	6827809.791311	1.505718	48.541128
589710.90706	6827811.919647	1.505841	48.541148
591761.698516	6824695.933839	1.534402	48.513468
591789.270987	6824684.513904	1.534778	48.51337
592018.841167	6823870.785995	1.538089	48.50609
591977.139312	6823843.302849	1.537532	48.505835
591973.057467	6823837.244967	1.537478	48.50578
591956.407214	6823820.613738	1.537257	48.505628
591926.838996	6823775.243815	1.536868	48.505215
591919.827738	6823764.826988	1.536776	48.50512
591910.829801	6823750.453736	1.536658	48.504989
591915.09353	6823715.204437	1.536724	48.504673
591915.625398	6823715.166784	1.536731	48.504673
591926.289647	6823708.511385	1.536877	48.504615
591915.243943	6823713.963216	1.536726	48.504662
591960.057241	6823687.37591	1.53734	48.50443
591960.176925	6823686.823965	1.537341	48.504425
591961.773683	6823685.432417	1.537363	48.504413
592009.572961	6823654.194709	1.538018	48.50414
592008.265857	6823548.149222	1.538027	48.503186
591996.363521	6823525.772115	1.537872	48.502983
591984.114117	6823491.674971	1.537714	48.502674
591888.587771	6823367.387541	1.536453	48.50154
591888.560224	6823367.573353	1.536452	48.501542
591787.640108	6823200.462584	1.535128	48.500022
591612.347244	6823161.549157	1.532766	48.499643
591586.281801	6823179.655749	1.532408	48.499801
591585.938087	6823181.823986	1.532403	48.499821
591555.755195	6823181.331979	1.531995	48.499811
591512.674617	6823180.996635	1.531412	48.499801
591296.76434	6823292.67069	1.528462	48.500769
591747.818888	6823413.424037	1.534536	48.501931
591756.446499	6823434.147379	1.534647	48.502119
591756.614846	6823433.884832	1.53465	48.502116
591761.254982	6823463.329594	1.534705	48.502382
591919.872417	6823472.840228	1.53685	48.502494
591723.533183	6823082.340065	1.53429	48.498949
591707.98564	6823025.858669	1.534094	48.498438
591709.459717	6823019.521803	1.534116	48.498381
591709.145202	6823010.917326	1.534114	48.498304
591624.432391	6822846.658835	1.533008	48.496812
591563.323417	6822786.231502	1.532197	48.496259
591554.112884	6822793.867271	1.53207	48.496326
591534.328796	6822814.439096	1.531797	48.496508
591569.761385	6822780.046309	1.532285	48.496204
591596.746764	6822752.685391	1.532657	48.495963
591660.869923	6822723.630987	1.533532	48.495712
591512.805778	6822532.379502	1.531577	48.493967
591430.943599	6822523.260177	1.530471	48.493871
591432.852895	6822523.67245	1.530497	48.493875
591329.61395	6822540.103907	1.529096	48.494006
591333.114938	6822536.517975	1.529144	48.493974
591254.086471	6822563.803137	1.528068	48.494206
591445.983725	6822426.126846	1.530699	48.493
591444.578945	6822413.889197	1.530683	48.49289
591471.187513	6822348.227072	1.53106	48.492304
591619.01675	6822089.12228	1.533126	48.489998
591614.415811	6822068.864939	1.533068	48.489815
591613.398493	6822067.123493	1.533055	48.489799
591610.976546	6822062.461879	1.533024	48.489757
591601.709049	6822045.765628	1.532902	48.489605
591600.930757	6822043.553405	1.532892	48.489585
591585.876709	6822013.80843	1.532696	48.489315
591412.717415	6822304.799927	1.53028	48.491903
591489.133694	6822213.457993	1.531337	48.491095
591502.412155	6822204.013951	1.531519	48.491012
591393.703524	6822234.057332	1.53004	48.491264
591458.264743	6822170.363258	1.53093	48.490702
591458.785198	6822170.708732	1.530937	48.490705
591456.829933	6822171.152773	1.53091	48.490709
584378.488649	6829490.844099	1.433167	48.555319
584420.149661	6829450.857568	1.433742	48.554966
584442.369697	6829470.016831	1.434038	48.555143
584442.404799	6829469.605356	1.434038	48.555139
584447.274767	6829474.018069	1.434103	48.55518
584405.516547	6829291.453787	1.433586	48.55353
584375.806007	6829275.232288	1.433188	48.553379
584293.807749	6829331.296025	1.432062	48.553869
584265.377846	6829398.243182	1.431659	48.554466
584260.754551	6829408.755838	1.431594	48.554559
584183.228352	6829486.083664	1.430522	48.555241
584224.606031	6829522.802798	1.431073	48.555579
584196.828499	6828993.993956	1.430839	48.550818
584427.57934	6829303.904663	1.433882	48.553646
584630.947559	6829285.09539	1.436642	48.553513
584719.948224	6829197.814718	1.437871	48.552744
584768.395447	6829348.365469	1.438487	48.554107
584770.232027	6829348.004847	1.438512	48.554104
584772.505553	6829347.530573	1.438543	48.5541
584866.006029	6829306.306137	1.439821	48.553746
584831.532757	6829323.576104	1.439349	48.553895
584809.553692	6829387.282795	1.439034	48.554464
584797.561573	6829465.422632	1.438851	48.555165
584724.739672	6829496.8931	1.437856	48.555435
584702.426216	6829490.147553	1.437555	48.55537
584667.324651	6829569.986734	1.437058	48.556082
584666.876994	6829570.190175	1.437052	48.556084
584666.877691	6829570.53608	1.437052	48.556087
584518.910608	6829470.472788	1.435074	48.55516
584519.54625	6829470.07103	1.435083	48.555157
584520.728535	6829469.794334	1.435099	48.555155
584561.780912	6829512.056973	1.435644	48.555542
584527.367657	6829561.908883	1.435164	48.555984
585797.699185	6831117.781518	1.451962	48.570203
585865.592097	6831187.17011	1.452863	48.570839
585867.830919	6831190.313662	1.452893	48.570867
585885.623531	6831205.062055	1.45313	48.571003
585920.558265	6831193.156863	1.453607	48.570902
585922.169468	6831192.053565	1.453629	48.570893
586114.061694	6831199.117619	1.456227	48.57099
586134.068561	6831173.406229	1.456505	48.570762
586139.564614	6831165.694689	1.456582	48.570694
586201.190076	6831078.840806	1.45744	48.569923
586209.756009	6831071.526473	1.457558	48.569859
586201.823217	6831187.852356	1.45742	48.570904
586205.115844	6831181.953688	1.457466	48.570851
586221.167137	6831150.343483	1.457692	48.57057
586203.243833	6831263.405385	1.457419	48.571584
586167.197737	6831293.142492	1.456923	48.571845
586113.106005	6831336.547575	1.456178	48.572226
586109.769673	6831340.201754	1.456132	48.572258
586097.990535	6831350.479283	1.45597	48.572348
586035.406632	6831448.496909	1.455095	48.573219
585971.196768	6831436.494362	1.454228	48.5731
585567.673982	6831625.165912	1.448709	48.574725
585506.655997	6831643.99797	1.447877	48.574884
585372.563854	6831688.059991	1.446048	48.575256
585402.526285	6831709.356194	1.446449	48.575453
585936.335692	6831453.670085	1.453751	48.573248
587817.814423	6830807.198937	1.479419	48.567762
587819.723579	6830808.05785	1.479445	48.56777
587819.36693	6830808.484763	1.47944	48.567774
587879.41894	6830938.221755	1.48022	48.568951
587905.098159	6830963.841306	1.480561	48.569186
587905.168796	6830963.33651	1.480562	48.569182
587923.291993	6830975.579831	1.480805	48.569295
587926.898254	6830984.596995	1.480851	48.569377
587949.903368	6831010.771633	1.481156	48.569616
587991.047065	6831073.820902	1.481697	48.57019
587995.690091	6831084.328483	1.481757	48.570286
587996.326261	6831090.400723	1.481764	48.57034
587992.143132	6831231.486594	1.481671	48.571608
587982.973428	6831255.410948	1.48154	48.571822
587955.711772	6831295.657418	1.48116	48.572179
587948.970566	6831305.636556	1.481066	48.572268
587948.414558	6831305.032627	1.481059	48.572262
587929.164472	6831325.447829	1.480793	48.572443
587891.185518	6831363.467073	1.480268	48.572778
587879.71611	6831381.629374	1.480108	48.572939
587850.221496	6831417.938214	1.479699	48.573261
587782.421426	6831598.156143	1.478733	48.57487
587794.340223	6831673.016048	1.478875	48.575545
587801.586144	6831686.38899	1.47897	48.575667
587823.199136	6831707.175761	1.479257	48.575857
587819.652436	6831726.285179	1.479204	48.576029
587800.948949	6831661.973684	1.478967	48.575447
587747.374534	6831428.774472	1.478302	48.57334
587745.324446	6831413.213592	1.478278	48.5732
587745.856774	6831412.279848	1.478286	48.573192
587745.885926	6831412.186629	1.478286	48.573191
587761.689505	6831323.054675	1.478524	48.572392
587786.699035	6831267.41706	1.478877	48.571896
587803.640593	6831243.719469	1.479113	48.571686
587832.845797	6831214.189257	1.479517	48.571425
587843.090657	6831179.631638	1.479664	48.571116
587851.077341	6831162.06759	1.479777	48.57096
587859.398912	6831128.476708	1.479899	48.570659
587874.268849	6831123.718186	1.480102	48.570619
587874.044645	6831116.575558	1.4801	48.570555
587868.002423	6831113.3902	1.480019	48.570525
587939.872884	6830693.219693	1.481103	48.566758
587983.687406	6830664.091956	1.481704	48.566504
589551.991372	6830662.354707	1.502957	48.566758
589551.635176	6830661.839498	1.502952	48.566753
589571.479266	6830646.894619	1.503225	48.566622
589576.203695	6830640.627977	1.50329	48.566566
589637.906297	6830538.580785	1.504153	48.565659
589638.497455	6830538.449132	1.504161	48.565658
589710.865843	6830520.332453	1.505146	48.565507
589712.590746	6830431.099826	1.505192	48.564705
589646.88022	6830296.560033	1.504336	48.563484
589690.579661	6830352.246314	1.504914	48.563992
589701.589815	6830289.167691	1.50508	48.563427
589705.863154	6830287.474567	1.505138	48.563412
589672.881858	6830250.317122	1.504701	48.563073
589705.401692	6830221.611143	1.505149	48.56282
589709.878395	6830285.218043	1.505193	48.563393
589751.327785	6830286.752921	1.505754	48.563414
589853.401701	6830253.14604	1.507146	48.563129
590029.587916	6830101.793627	1.509572	48.561797
590029.639548	6830101.585721	1.509573	48.561796
590030.788782	6830100.205077	1.509589	48.561783
590051.618805	6829938.705379	1.509912	48.560334
590044.520417	6829999.516415	1.5098	48.56088
589947.674242	6830361.529011	1.508396	48.56412
589955.619701	6830446.495725	1.508481	48.564885
589997.539607	6830292.528339	1.509089	48.563507
590072.647367	6830371.835379	1.510086	48.564233
589955.011881	6830498.471762	1.50846	48.565352
589958.455896	6830509.201123	1.508504	48.565449
589958.455045	6830661.092189	1.508465	48.566816
589956.326381	6830689.201026	1.508429	48.567068
589952.81083	6830723.451376	1.508373	48.567375
589950.62225	6830747.734661	1.508337	48.567593
589951.121802	6830747.98466	1.508343	48.567596
589951.415429	6830749.77973	1.508347	48.567612
589829.378145	6831134.281626	1.506595	48.571049
589537.249546	6832054.0227	1.502399	48.579272
589469.934225	6832248.703423	1.501437	48.581011
589889.878925	6830941.910257	1.507464	48.56933
589651.726936	6830970.004403	1.504229	48.569542
589673.590243	6830992.145896	1.50452	48.569745
589671.552197	6830988.391765	1.504493	48.56971
589672.528406	6830868.818775	1.504537	48.568635
589671.339735	6830868.115482	1.504521	48.568629
589669.342368	6830868.459081	1.504494	48.568631
589666.754058	6830868.640916	1.504459	48.568633
589638.628126	6830874.421187	1.504076	48.56868
589637.93868	6830878.180654	1.504066	48.568713
589822.714552	6830659.380476	1.506626	48.566777
589811.646369	6830644.212009	1.50648	48.566639
589810.532102	6830641.212498	1.506466	48.566612
589784.951174	6830617.139501	1.506125	48.566391
589782.294229	6830615.000001	1.50609	48.566371
589709.487998	6830558.307383	1.505118	48.565849
589704.531032	6830554.599251	1.505051	48.565815
589657.182676	6830872.726146	1.504328	48.568668
589658.012875	6830870.520642	1.50434	48.568648
590107.837175	6830526.756134	1.510524	48.565633
590208.446638	6830253.908595	1.511957	48.563196
590345.856359	6830104.572405	1.513857	48.561876
590354.619846	6830066.01098	1.513985	48.561531
590355.400453	6830065.082086	1.513996	48.561522
590353.86217	6830069.138468	1.513974	48.561559
590349.233401	6829989.523284	1.513932	48.560842
590348.891452	6829990.743507	1.513927	48.560853
590347.134663	6829957.226012	1.513912	48.560551
590230.713132	6830084.70121	1.512302	48.561678
590202.264594	6830061.452631	1.511922	48.561464
590197.672171	6830059.034399	1.51186	48.561441
590223.713813	6829977.528663	1.512234	48.560713
590240.359815	6829975.507064	1.51246	48.560697
590276.351549	6829967.345584	1.51295	48.56063
590276.353294	6829967.438206	1.51295	48.560631
590312.410396	6829970.953404	1.513438	48.560669
590312.486422	6829998.640534	1.513431	48.560918
590312.368531	6829997.311603	1.51343	48.560906
590312.495041	6830035.900259	1.513422	48.561253
590308.406794	6829959.054605	1.513386	48.560561
590307.576617	6829946.833532	1.513378	48.560451
590264.414655	6829887.340018	1.512809	48.559908
590083.701581	6828961.541571	1.510597	48.551551
590070.824735	6828123.12732	1.510636	48.544008
592062.510245	6829330.597538	1.537311	48.555203
591416.919049	6829843.294705	1.528435	48.559707
589998.948266	6828287.274363	1.509621	48.545473
589975.703353	6828284.825467	1.509307	48.545447
589974.92116	6828283.703673	1.509296	48.545436
589931.542049	6828273.132545	1.508711	48.545334
589825.072887	6828155.678945	1.507299	48.544259
589850.296025	6828110.199877	1.507653	48.543855
589868.21586	6828062.014469	1.507908	48.543424
589894.757315	6828037.469134	1.508274	48.543208
589913.137724	6828021.166811	1.508527	48.543065
589969.78431	6827962.802676	1.509309	48.542549
589837.318495	6828011.938152	1.507502	48.542969
589585.992023	6828102.554333	1.504075	48.543741
589422.498082	6828077.28663	1.501867	48.543486
589344.445919	6828073.017435	1.50081	48.543434
589321.544705	6828070.481216	1.500501	48.543407
589226.057855	6828051.120861	1.499213	48.543217
589178.636077	6828042.256688	1.498572	48.543129
589151.572561	6828033.348442	1.498208	48.543044
589041.379336	6827969.685479	1.496732	48.542453
588953.697413	6827927.807969	1.495555	48.542061
588892.457769	6827896.339192	1.494734	48.541768
588977.89408	6828075.291605	1.495845	48.543392
589018.028575	6828108.312095	1.49638	48.543696
589046.918557	6828147.183433	1.496761	48.54405
589048.340914	6828148.441163	1.49678	48.544062
589079.047931	6828272.708793	1.497164	48.545185
589380.506671	6832719.492455	1.500103	48.58523
589079.299142	6833148.780189	1.495909	48.589039
588718.944835	6833380.682961	1.490964	48.591063
588718.369248	6833380.005202	1.490956	48.591057
588649.585274	6833378.886467	1.490024	48.591035
588648.057567	6833384.348551	1.490002	48.591084
588648.65019	6833449.605763	1.489993	48.591671
588641.479982	6833462.937455	1.489892	48.591789
588643.518572	6833474.493117	1.489917	48.591894
588642.661995	6833486.922637	1.489902	48.592005
588642.667357	6833488.488462	1.489902	48.592019
588597.422206	6833275.464584	1.489344	48.590096
588602.037362	6833249.756272	1.489413	48.589865
588592.530689	6833230.498467	1.489289	48.589691
588578.036667	6833216.515716	1.489096	48.589562
588583.831432	6833213.038243	1.489176	48.589532
588589.294888	6833201.94752	1.489253	48.589433
588597.65794	6833180.825124	1.489371	48.589245
588611.692134	6833147.174962	1.48957	48.588944
588738.051281	6833225.495137	1.491263	48.589671
591809.223016	6831983.335904	1.533212	48.579019
591850.796969	6831900.040794	1.533797	48.578277
591877.628609	6831862.029101	1.53417	48.57794
591891.970921	6831801.811102	1.534379	48.577401
591891.803982	6831801.804935	1.534377	48.577401
591860.219918	6831831.028306	1.533942	48.577658
591933.311581	6831849.784153	1.534928	48.577839
591873.606596	6831934.845218	1.534097	48.578594
591884.900827	6832000.254819	1.534234	48.579184
591971.007159	6832086.001053	1.535379	48.57997
591802.949779	6832064.403343	1.533107	48.579747
591779.970733	6832088.698646	1.532789	48.579962
591785.79454	6832115.244626	1.532861	48.580202
590786.144692	6832658.067162	1.519174	48.584916
588701.679307	6833239.471306	1.490766	48.58979
588671.939684	6833259.806963	1.490358	48.589968
588666.252206	6833263.066095	1.49028	48.589996
588596.043334	6833375.623712	1.489299	48.590996
588568.313668	6833384.95073	1.488921	48.591075
588549.124679	6833386.661566	1.48866	48.591088
588534.592004	6833385.821696	1.488463	48.591077
588518.864806	6833386.533597	1.48825	48.591081
588497.387297	6833423.384334	1.487949	48.591409
588500.159914	6833437.412225	1.487983	48.591536
588434.58633	6833381.186196	1.487109	48.591019
587730.41494	6833328.122203	1.477576	48.59042
585643.310856	6833694.389605	1.449184	48.593348
585714.176002	6833754.99341	1.450128	48.593906
585752.617256	6833773.885808	1.450644	48.594083
585675.656529	6833751.975364	1.449607	48.593872
585657.130727	6833786.104301	1.449347	48.594176
585680.547867	6833868.528361	1.449642	48.594921
585618.967792	6833873.595638	1.448806	48.594956
585618.690309	6833869.54569	1.448803	48.594919
585533.238502	6833803.750517	1.447662	48.594312
585476.486244	6833822.024103	1.446888	48.594467
585459.511584	6833826.206507	1.446657	48.594501
585482.531831	6833823.563787	1.446969	48.594482
584755.728256	6833865.184806	1.437104	48.594727
584753.57863	6833863.093095	1.437076	48.594708
584342.173734	6832692.409262	1.431813	48.584106
584336.940375	6832617.28019	1.431762	48.583429
584264.068579	6832771.977099	1.430733	48.584807
584263.421397	6832775.511013	1.430723	48.584839
584255.689508	6832871.492899	1.430592	48.585701
584256.438168	6832874.322657	1.430602	48.585727
584276.637662	6832940.521589	1.430858	48.586326
583996.882391	6833532.898604	1.426906	48.591603
583987.981994	6833556.926589	1.426778	48.591818
584446.90589	6834068.835749	1.432862	48.596503
584511.919628	6834094.880352	1.433737	48.596749
584607.904963	6834014.595886	1.43506	48.596044
584561.058115	6833958.841458	1.43444	48.595535
584702.172027	6834170.487955	1.436296	48.597463
584703.366893	6834170.884349	1.436312	48.597467
584721.033451	6834168.641127	1.436552	48.59745
584773.555042	6834185.821356	1.43726	48.597614
584864.806683	6834164.603612	1.438503	48.597439
584864.455455	6834165.90471	1.438498	48.597451
584534.404363	6834279.745284	1.433992	48.598416
584531.535543	6834285.018955	1.433952	48.598463
584529.122415	6834366.237158	1.433897	48.599193
584572.032898	6834410.987329	1.434467	48.599603
584579.732619	6834418.964049	1.434569	48.599676
586776.257924	6835352.672191	1.464107	48.608461
586775.924001	6835352.026976	1.464102	48.608455
586981.815765	6835509.819345	1.466853	48.60991
587012.968679	6835483.584652	1.467282	48.60968
587059.39557	6835559.678053	1.467892	48.610372
587001.898684	6835561.214149	1.467112	48.610376
586918.989831	6835527.517767	1.465996	48.610059
586895.021498	6835603.168116	1.465651	48.610735
587305.544151	6836808.59605	1.470902	48.621647
587336.466772	6836919.156612	1.471293	48.622647
587355.999513	6836968.055655	1.471545	48.62309
587367.415708	6837010.400124	1.471688	48.623473
587375.946562	6837065.510508	1.47179	48.62397
587374.963699	6837011.548188	1.471791	48.623485
587402.498799	6836982.290313	1.472172	48.623226
587490.240729	6836924.282891	1.473377	48.62272
587534.388393	6836983.40279	1.473961	48.623259
587539.104545	6836987.320774	1.474024	48.623295
587538.770247	6836988.893209	1.474019	48.623309
587592.823015	6837040.412319	1.474738	48.623782
587594.392822	6837043.310086	1.474759	48.623808
587595.779755	6837044.744251	1.474777	48.623822
587710.301502	6837087.260561	1.47632	48.624224
587710.721585	6837086.61927	1.476326	48.624218
587446.149146	6836754.707191	1.472824	48.621187
587456.942394	6836710.533875	1.472982	48.620792
587456.024253	6836716.413984	1.472968	48.620844
587465.301346	6836674.03367	1.473105	48.620465
587465.09028	6836673.030836	1.473102	48.620456
587439.268631	6836615.580119	1.472767	48.619935
587439.150261	6836615.526812	1.472765	48.619934
587546.760402	6836598.867586	1.474229	48.619803
587595.998136	6836542.974568	1.474912	48.619309
587618.310078	6836537.147674	1.475216	48.61926
587250.550218	6836769.007883	1.470167	48.621282
587251.706743	6836768.741466	1.470182	48.621279
587253.321155	6836767.873146	1.470204	48.621272
588402.512543	6835379.466001	1.486154	48.608985
588399.818552	6835377.886844	1.486118	48.60897
588395.814421	6835374.059557	1.486065	48.608935
588383.07127	6835363.799394	1.485895	48.60884
588301.895054	6835314.125112	1.484807	48.60838
588183.3245	6835380.24444	1.483182	48.608954
588224.63336	6835400.438425	1.483737	48.609143
588226.68307	6835403.225187	1.483764	48.609168
588277.381557	6835395.503052	1.484453	48.609107
588107.35034	6835428.602786	1.482139	48.609376
589116.811025	6835209.033961	1.495886	48.607575
590356.624682	6834775.107704	1.51281	48.603883
590396.967796	6834777.041208	1.513357	48.603908
590394.00272	6834774.190642	1.513318	48.603881
590283.509227	6834356.645855	1.511926	48.600107
590199.736467	6834328.725979	1.510797	48.599842
590199.824168	6834329.107313	1.510798	48.599846
590147.17013	6834191.533003	1.510119	48.598599
590139.364785	6834185.425853	1.510015	48.598543
590139.814394	6834185.661369	1.510021	48.598545
590130.325752	6834173.229628	1.509896	48.598432
590132.004033	6834175.023325	1.509918	48.598448
590098.553474	6834140.892374	1.509473	48.598136
590098.374282	6834140.895757	1.509471	48.598136
589612.278381	6833975.848556	1.502922	48.596569
590352.455985	6834337.862126	1.512866	48.59995
590352.223222	6834337.968434	1.512862	48.599951
590378.427058	6834304.510128	1.513226	48.599655
590378.432504	6834304.472962	1.513226	48.599654
590394.319442	6834280.854772	1.513448	48.599445
590393.34566	6834281.339487	1.513435	48.599449
590448.374992	6834273.184375	1.514183	48.599385
590508.386632	6834175.956239	1.515021	48.598521
590558.74694	6834138.699559	1.515714	48.598194
590582.236152	6834119.562666	1.516037	48.598026
590598.562812	6834109.406247	1.516261	48.597937
590681.017786	6834220.832439	1.517351	48.598953
590681.167526	6834219.915398	1.517353	48.598945
590406.227889	6834391.65087	1.513581	48.600443
590406.10362	6834391.622323	1.513579	48.600443
590406.874661	6834391.53368	1.51359	48.600442
590469.460355	6834332.975441	1.514453	48.599926
590495.9763	6834308.515116	1.514819	48.599711
590513.799768	6834286.278505	1.515067	48.599514
590524.939734	6834250.49435	1.515227	48.599194
590531.790395	6834261.419668	1.515317	48.599293
590499.790433	6834379.178836	1.514853	48.600347
590588.190078	6834368.914875	1.516054	48.600269
590590.721027	6834371.038602	1.516088	48.600289
590590.154764	6834372.812844	1.51608	48.600305
590741.917177	6834609.676145	1.518077	48.602461
590739.797616	6834632.429636	1.518043	48.602665
590741.675678	6834633.697782	1.518068	48.602677
590742.299388	6834635.310689	1.518076	48.602691
590742.88351	6834638.437763	1.518083	48.60272
590829.948794	6834662.359472	1.519258	48.602949
590866.396723	6834589.047159	1.519771	48.602296
590828.300508	6834660.824455	1.519236	48.602935
590826.223204	6834662.114306	1.519207	48.602947
590704.062631	6834744.278503	1.51753	48.603665
590691.316091	6834751.124418	1.517355	48.603724
590556.318034	6834753.874198	1.515524	48.603726
590553.713075	6834711.658451	1.515499	48.603346
590569.378791	6834706.873062	1.515713	48.603306
590581.021221	6834693.904367	1.515874	48.603191
590528.510144	6834681.601339	1.515165	48.603071
590523.191517	6834671.261822	1.515096	48.602978
590520.446534	6834665.648915	1.51506	48.602927
590517.940846	6834658.295702	1.515028	48.60286
590496.930993	6834618.856941	1.514753	48.602502
590496.078521	6834618.230544	1.514742	48.602496
590491.726214	6834601.769764	1.514687	48.602347
590480.154017	6834584.632516	1.514534	48.602191
590478.692769	6834581.874073	1.514515	48.602166
590439.548901	6834543.215328	1.513994	48.601812
590460.921239	6834565.088242	1.514278	48.602012
590499.561765	6834594.744003	1.514795	48.602285
590438.795993	6834851.977616	1.513905	48.604589
590436.674037	6834853.194324	1.513876	48.604599
590433.364186	6834855.322918	1.513831	48.604618
590595.121915	6834853.484895	1.516025	48.604629
590693.777682	6834898.340718	1.517351	48.605049
590656.626294	6834933.643472	1.516838	48.60536
590654.401007	6834962.59483	1.516801	48.60562
590654.618591	6834963.971359	1.516803	48.605632
590648.782378	6834991.202246	1.516717	48.605876
590606.217967	6835021.927785	1.516132	48.606145
590644.897588	6835044.649834	1.516651	48.606356
590774.874348	6835234.143022	1.518365	48.608082
590849.256945	6835295.434531	1.519359	48.608646
590846.887876	6835291.377254	1.519327	48.608609
590878.12475	6835322.070122	1.519743	48.608891
590745.062557	6834787.469175	1.518075	48.60406
590749.823818	6834783.942173	1.51814	48.604029
590807.197802	6834798.212978	1.518915	48.604167
590845.572536	6834877.47931	1.519415	48.604887
590849.02268	6834883.480669	1.51946	48.604941
590869.240043	6834910.828168	1.519727	48.605191
590876.052458	6834918.137856	1.519818	48.605257
590930.273838	6834934.782344	1.520549	48.605416
590988.063978	6834963.121977	1.521325	48.605681
590989.830549	6834963.061095	1.521349	48.605681
591071.156699	6834988.770973	1.522446	48.605926
591078.9025	6834992.474447	1.52255	48.60596
591092.152992	6835001.325594	1.522727	48.606042
591139.484262	6835023.085979	1.523364	48.606246
571827.488923	6820478.183975	1.265817	48.4719
571914.469127	6820429.572897	1.267008	48.47148
571948.939396	6820412.450422	1.267479	48.471333
572023.93316	6820317.359754	1.268522	48.470492
571815.798415	6820533.900941	1.265642	48.472399
571820.419348	6820541.143882	1.265703	48.472465
571789.018434	6820841.16526	1.265189	48.475157
571781.743567	6820714.551268	1.265128	48.474017
571778.269977	6820703.397801	1.265084	48.473916
570950.977206	6821249.050138	1.253731	48.478659
570947.277576	6821309.812222	1.253663	48.479205
570912.374885	6821336.157361	1.253183	48.479435
570838.070855	6821237.362985	1.252207	48.478532
570651.627338	6821401.213673	1.249636	48.479968
570805.67549	6821617.268326	1.251655	48.481942
570805.485513	6821621.837387	1.251651	48.481983
570149.469989	6821797.586757	1.242723	48.483433
571736.81262	6822377.657813	1.264026	48.488966
571738.57539	6822380.058999	1.264049	48.488988
571741.839135	6822385.373651	1.264091	48.489036
571888.829117	6822617.857948	1.266011	48.491156
571997.078171	6822840.111349	1.26741	48.493177
572013.479484	6822868.549058	1.267623	48.493436
572006.815318	6822902.190601	1.267523	48.493737
572012.67102	6822927.962679	1.267595	48.49397
571859.485661	6822809.927516	1.265557	48.492878
571708.094515	6822872.601892	1.26349	48.493412
571663.538783	6822809.034436	1.262906	48.492831
571651.312415	6822800.09649	1.262743	48.492748
571607.791898	6822764.464244	1.262165	48.492419
571624.591014	6822734.608102	1.262401	48.492154
571665.907167	6822646.11079	1.262986	48.491366
571699.688949	6822692.106622	1.26343	48.491787
571421.551384	6822677.636686	1.259671	48.491601
571462.283565	6822654.399467	1.260229	48.4914
571535.290382	6822688.531802	1.261206	48.491722
571533.616004	6822906.703834	1.261119	48.493684
571567.328267	6822983.595325	1.261552	48.494382
571629.136019	6823020.480246	1.262377	48.494726
571248.248285	6823066.574706	1.257209	48.495065
571544.144748	6823099.837191	1.261204	48.495423
571317.901852	6823806.22601	1.257931	48.501731
571301.415398	6823846.105073	1.257696	48.502086
571298.516072	6823849.158801	1.257656	48.502113
571290.796313	6823921.157159	1.25753	48.502759
571294.801187	6824071.461049	1.257539	48.504112
571311.541663	6824153.701944	1.257741	48.504855
571409.789785	6824143.325181	1.259074	48.504781
571413.296717	6824137.496909	1.259123	48.504729
571454.66102	6824066.986856	1.259704	48.504103
571446.711506	6824078.904878	1.259593	48.504209
571441.720667	6824085.686237	1.259523	48.504269
571427.334004	6824112.379903	1.259321	48.504506
571278.437077	6824240.854307	1.257267	48.505632
571264.220112	6824307.721035	1.257055	48.506231
571258.685961	6824336.996402	1.256971	48.506493
571257.940222	6824342.773085	1.256959	48.506545
571255.589945	6824353.011142	1.256924	48.506636
571249.669185	6824378.798781	1.256837	48.506867
571247.099262	6824395.632746	1.256797	48.507018
571241.921466	6824416.082356	1.256721	48.507201
570911.629488	6824739.660422	1.252153	48.510045
571324.728187	6824325.528599	1.257868	48.506403
571400.684368	6824284.513689	1.258909	48.506049
571410.184825	6824307.83921	1.25903	48.506261
571391.366183	6824225.643812	1.2588	48.505518
571398.034867	6824226.707466	1.25889	48.505529
571076.040864	6824262.084196	1.254522	48.505783
571029.152803	6824223.417203	1.253899	48.505426
570124.777537	6824098.948912	1.241696	48.504126
570118.596016	6824105.872233	1.24161	48.504187
570112.758038	6824112.645833	1.241529	48.504247
570073.573413	6824447.028978	1.240898	48.507246
570090.101835	6824438.395619	1.241124	48.507172
570233.607455	6824459.720713	1.24306	48.507392
570256.231929	6824513.81143	1.24335	48.507883
570336.464079	6824348.855975	1.244486	48.506416
570319.412222	6824318.936002	1.244264	48.506143
572055.481515	6824497.383357	1.267708	48.508093
572082.742987	6824531.874658	1.268067	48.508409
572314.550906	6824251.172414	1.271287	48.50593
572282.592907	6824237.220063	1.270859	48.505798
572205.235061	6824252.708432	1.269807	48.505922
572258.611929	6824234.594991	1.270535	48.50577
572318.911211	6824257.979907	1.271344	48.505992
573338.45436	6824267.258171	1.285141	48.506275
573337.867946	6824324.372298	1.285116	48.506789
573320.947841	6824479.958899	1.284841	48.508185
572101.027924	6822630.487814	1.268878	48.491312
572222.373614	6822626.982087	1.270521	48.491304
572358.548412	6822627.101519	1.272364	48.491332
572414.641298	6822624.262109	1.273124	48.491317
572449.175217	6822620.226821	1.273592	48.491288
572480.075768	6822614.909124	1.274012	48.491246
572483.549211	6822570.052495	1.274072	48.490843
572426.483513	6822509.45544	1.273318	48.490287
572472.599356	6822454.842437	1.273958	48.489805
572459.363452	6822403.676854	1.273794	48.489342
572459.315168	6822400.614085	1.273794	48.489315
572544.184135	6822597.012079	1.274885	48.491098
572553.175938	6822595.175595	1.275007	48.491083
572733.304209	6822501.953227	1.277472	48.49028
573454.044367	6822358.417121	1.287266	48.48913
573474.196837	6822228.33011	1.287577	48.487964
573578.77554	6821903.016629	1.289087	48.485059
574268.622864	6821470.944589	1.298546	48.481307
575080.132817	6821019.547035	1.309655	48.477404
575067.365001	6820986.68109	1.309492	48.477106
574974.044237	6820806.914194	1.308282	48.475471
574946.589073	6820724.876731	1.307934	48.474728
574945.364932	6820722.691623	1.307918	48.474708
574944.421046	6820720.868037	1.307906	48.474691
574942.121986	6820715.651473	1.307876	48.474644
574917.042232	6820677.691296	1.307548	48.474298
574915.855938	6820676.123077	1.307532	48.474283
574904.565212	6820659.048089	1.307385	48.474127
574857.567331	6820564.748856	1.306776	48.47327
574830.467495	6820507.202106	1.306426	48.472747
574577.954271	6820628.092866	1.302976	48.473786
574562.401294	6820578.838718	1.30278	48.47334
574562.01011	6820577.942205	1.302775	48.473332
574503.219673	6820737.190953	1.301933	48.474753
574942.404372	6820593.524339	1.307915	48.473545
574945.831608	6820528.775339	1.307981	48.472964
574949.173666	6820538.404582	1.308023	48.473051
575068.332726	6820533.81064	1.309636	48.473033
575080.803516	6820530.180312	1.309806	48.473002
575114.554733	6820431.90262	1.310291	48.472125
575112.746155	6820427.886179	1.310267	48.472088
575182.936786	6820390.431596	1.311228	48.471765
575280.936215	6820461.798257	1.312533	48.472426
575306.095747	6820455.139232	1.312875	48.472371
575312.090765	6820352.023415	1.312986	48.471445
575199.413128	6820318.513441	1.311471	48.471121
575226.322176	6820260.91274	1.311852	48.470609
575158.844328	6820161.659975	1.310968	48.469703
575283.359086	6820178.803737	1.312647	48.469881
575287.929073	6820145.004872	1.312719	48.469578
575282.556055	6820124.701946	1.312652	48.469394
575279.265626	6820111.66797	1.312611	48.469276
575280.381103	6820111.085119	1.312626	48.469271
575262.980032	6820048.495886	1.312409	48.468705
575273.064334	6820052.90375	1.312544	48.468747
575310.771171	6820094.789592	1.313042	48.469131
575328.616905	6820074.083211	1.31329	48.468948
575358.040112	6820041.804251	1.313697	48.468663
575351.378328	6820158.458344	1.313573	48.469711
575388.254387	6820199.794163	1.31406	48.47009
575323.852574	6820215.410639	1.313184	48.470218
575382.561099	6820430.289776	1.313916	48.472162
575419.999125	6820417.927179	1.314426	48.472058
575518.446375	6820366.945204	1.315773	48.471618
575533.563304	6820357.190599	1.31598	48.471534
575593.269275	6820299.556194	1.316804	48.471027
575594.174505	6820298.696835	1.316817	48.471019
575595.998509	6820297.632583	1.316841	48.47101
575656.423824	6820283.8766	1.317663	48.470898
575696.044434	6820274.709094	1.318201	48.470823
575759.570253	6820258.695346	1.319065	48.470691
575829.647754	6820569.180668	1.319924	48.473497
575645.932494	6820613.34183	1.317426	48.473859
575910.232301	6820686.717844	1.32098	48.474569
575901.41668	6820696.71736	1.320858	48.474658
575911.094604	6820682.971737	1.320993	48.474536
575871.885272	6820797.284966	1.320429	48.475557
575807.490545	6820817.921057	1.319552	48.47573
575802.366304	6820817.347577	1.319483	48.475724
575756.195665	6820824.007127	1.318857	48.475775
575656.351549	6820811.772672	1.31751	48.475646
575655.449635	6820808.987568	1.317498	48.47562
575632.469865	6820737.905306	1.317208	48.474977
575631.652085	6820736.168491	1.317197	48.474961
575629.756978	6820731.2797	1.317173	48.474917
575614.155485	6820688.901937	1.316974	48.474532
575614.209559	6820686.207647	1.316976	48.474508
575603.784114	6820660.215048	1.316842	48.474272
575603.558376	6820659.509515	1.316839	48.474266
575602.981252	6820657.724335	1.316832	48.47425
575603.432666	6820655.645443	1.316839	48.474231
575601.245614	6820656.53213	1.316809	48.474239
575594.564879	6820639.935112	1.316723	48.474088
575585.61408	6820612.484242	1.31661	48.47384
575580.331062	6820596.336152	1.316543	48.473693
575569.930134	6820565.401567	1.316412	48.473413
575569.309667	6820564.204123	1.316404	48.473402
575568.551503	6820562.067635	1.316394	48.473383
575557.146576	6820531.129781	1.316249	48.473102
575552.661078	6820520.134791	1.316191	48.473003
575528.812041	6820478.418088	1.315881	48.472623
575671.062117	6820428.181495	1.317819	48.472198
575669.594607	6820429.108415	1.317799	48.472206
575661.057542	6820476.034087	1.31767	48.472627
575704.885633	6820461.971312	1.318267	48.472509
575717.421033	6820375.227606	1.318461	48.471731
575716.793675	6820373.706007	1.318453	48.471717
575659.585455	6820372.63003	1.31768	48.471697
575680.947468	6820362.511106	1.317972	48.47161
575541.718954	6820779.344854	1.315968	48.475332
575537.481182	6820777.338182	1.315912	48.475313
575539.63073	6820823.49575	1.315927	48.475729
575525.900536	6820856.381212	1.315732	48.476022
575476.606301	6820865.883068	1.315063	48.476098
575485.21052	6820755.422724	1.315211	48.475106
575483.249429	6820754.414496	1.315185	48.475097
575402.85354	6820692.804851	1.314115	48.474527
575402.793711	6820691.743697	1.314114	48.474517
575235.234918	6820715.118079	1.311841	48.474695
575291.167312	6820661.285678	1.312613	48.474222
575282.668053	6820570.947585	1.312524	48.473408
575283.623433	6820568.681853	1.312538	48.473388
575437.105675	6820523.736985	1.314627	48.473013
575083.835591	6820662.842158	1.309808	48.474196
575378.333907	6821056.624894	1.313678	48.477794
575779.03177	6820895.120737	1.319145	48.476419
575774.658303	6820893.72521	1.319086	48.476405
575703.750199	6820861.302374	1.318136	48.4761
575697.541659	6820852.011734	1.318055	48.476015
575593.341818	6820864.186637	1.316642	48.476105
575638.951782	6820939.101009	1.317238	48.476787
576676.59801	6820663.882442	1.331353	48.47451
576711.136036	6820761.031709	1.331792	48.475391
577027.647874	6820600.239071	1.336119	48.474004
577049.427889	6821862.693452	1.336054	48.485363
577097.915489	6821949.591257	1.336685	48.486154
577103.534199	6821956.042067	1.336759	48.486213
577129.221637	6821978.503914	1.337101	48.48642
577168.276722	6821980.596966	1.337628	48.486446
577180.146061	6822041.183797	1.337772	48.486993
577106.659522	6822098.518567	1.336761	48.487495
577082.788121	6822104.892702	1.336436	48.487548
577078.822426	6822105.739118	1.336382	48.487555
577033.486108	6822130.377042	1.335762	48.487768
577031.533401	6822131.786399	1.335735	48.48778
576966.591885	6822145.923481	1.334853	48.487895
576526.397904	6822214.365585	1.328877	48.488427
576509.064295	6822227.827681	1.328639	48.488545
576431.729395	6822284.394078	1.327576	48.489039
576433.820727	6822282.811711	1.327605	48.489025
576949.048586	6822216.451403	1.334595	48.488526
577007.897245	6822248.034694	1.335382	48.488821
577064.092241	6822208.99465	1.336154	48.488481
577093.164184	6822195.716198	1.336551	48.488367
577115.834154	6822189.963479	1.336859	48.488319
577131.230784	6822165.947454	1.337074	48.488106
577145.247163	6822231.998917	1.337245	48.488703
577089.964352	6822298.472456	1.336478	48.48929
577052.466297	6822322.543643	1.335964	48.4895
577151.042269	6822338.620889	1.337293	48.489663
577157.123342	6822368.519033	1.337367	48.489933
577162.467343	6822393.132876	1.337432	48.490155
577161.422207	6822405.270998	1.337415	48.490264
577195.910562	6822286.50312	1.337915	48.489203
577216.525905	6822282.918911	1.338195	48.489174
577226.286934	6822278.408124	1.338329	48.489136
577229.571647	6822276.717541	1.338373	48.489121
577233.559506	6822215.413813	1.338445	48.48857
577229.118955	6822183.384024	1.338394	48.488281
577221.954494	6822138.492483	1.33831	48.487876
577222.302999	6822138.868119	1.338314	48.48788
577216.145494	6822108.570064	1.33824	48.487606
577212.589578	6822090.611308	1.338197	48.487444
577211.385004	6822086.658708	1.338181	48.487408
575211.989705	6823245.434074	1.310794	48.497449
575259.521709	6823360.978105	1.311404	48.498497
575314.797265	6823381.360198	1.312146	48.498691
575165.165822	6823379.230242	1.310122	48.498643
575117.657706	6823290.911749	1.309505	48.497839
575043.571748	6823142.8442	1.308545	48.496493
575160.363254	6823398.503514	1.310051	48.498815
575153.811261	6823450.33951	1.309948	48.49928
575134.093133	6823491.54564	1.309669	48.499647
575040.652123	6823600.070357	1.308373	48.500605
574508.367369	6823857.415346	1.301095	48.502817
574407.078013	6823832.290027	1.299731	48.502571
574272.767051	6824028.669185	1.297856	48.504311
574272.872291	6824028.666916	1.297857	48.504311
574236.238	6824250.844241	1.297297	48.506302
574325.877319	6824021.390528	1.298577	48.504256
574984.323953	6824158.916127	1.307449	48.50562
574984.658285	6824189.244642	1.307444	48.505893
575048.734612	6824122.100784	1.308331	48.505302
575059.990473	6824120.800246	1.308484	48.505292
575058.797465	6824119.173436	1.308468	48.505277
575060.053179	6824119.100204	1.308485	48.505277
575122.14975	6824100.566938	1.309331	48.505122
575105.999289	6824015.014326	1.309137	48.50435
575106.780331	6824014.185313	1.309148	48.504342
575106.171962	6824012.669515	1.30914	48.504329
575102.967672	6823996.653029	1.309101	48.504184
575103.707229	6823922.166356	1.309133	48.503514
575261.055134	6824285.961098	1.311157	48.506816
575356.931279	6824417.743778	1.312417	48.50802
575719.530267	6825438.8076	1.31703	48.517273
576073.084076	6825569.81297	1.321779	48.518519
576108.349881	6825903.956751	1.32216	48.521531
576098.068794	6825963.775413	1.322003	48.522067
576249.57149	6825634.339877	1.324149	48.519133
577187.582012	6826053.777798	1.336729	48.523083
577157.780363	6826065.876634	1.336322	48.523187
577133.853215	6826078.525115	1.335994	48.523296
577109.315539	6826095.686606	1.335657	48.523446
576632.222643	6826588.396684	1.329056	48.527786
576636.011639	6826594.858106	1.329106	48.527845
576652.526431	6826655.952842	1.329312	48.528398
576655.137817	6826710.614903	1.329332	48.52889
576654.339139	6826729.913828	1.329315	48.529063
576663.884632	6826794.287952	1.329426	48.529644
576618.650979	6826908.210302	1.328781	48.53066
576543.813389	6826953.467583	1.327755	48.531053
576593.474903	6826837.971397	1.32846	48.530023
576752.727192	6826819.875522	1.330622	48.529891
576762.612584	6826824.849152	1.330754	48.529938
577717.95659	6826656.637906	1.343738	48.528606
578091.036071	6826436.892187	1.348852	48.5267
578046.987499	6826395.287166	1.348268	48.526317
578246.053615	6826494.268359	1.350935	48.527245
578387.311897	6820138.619128	1.354641	48.470109
578547.78088	6820089.593263	1.356825	48.469698
578644.980444	6820005.153679	1.358164	48.468957
578775.530077	6819993.789639	1.359933	48.468879
578768.447289	6819996.500157	1.359836	48.468902
578759.330065	6819999.42899	1.359712	48.468927
579336.319983	6819994.656707	1.367517	48.468991
579526.284818	6820021.504735	1.370079	48.469268
580555.782636	6820534.060556	1.383862	48.474068
581059.624381	6820953.26376	1.390561	48.477931
581036.903837	6821010.118238	1.390238	48.478439
581048.451582	6821040.130692	1.390386	48.478711
580839.012826	6820824.058608	1.387613	48.476729
581136.11721	6821241.076718	1.391517	48.480534
581153.230844	6821262.720685	1.391742	48.480732
581262.578861	6821290.98618	1.393214	48.481006
581370.047812	6821248.533289	1.39468	48.480644
581242.335562	6821358.768885	1.392921	48.481612
581450.53139	6821951.983425	1.395575	48.486986
581466.686477	6821941.855573	1.395796	48.486897
581501.457857	6821989.612752	1.396254	48.487333
581624.187082	6821980.792857	1.397917	48.487276
581684.600536	6821983.853996	1.398733	48.487315
581726.350541	6821987.312652	1.399297	48.487354
581733.084646	6821988.547386	1.399388	48.487366
581762.336223	6821989.100238	1.399784	48.487376
581767.636282	6821989.879195	1.399855	48.487384
581783.15658	6821902.54216	1.400089	48.486602
581763.652259	6821900.652004	1.399826	48.486581
581815.037208	6822167.698395	1.400448	48.488992
581827.901427	6822208.872132	1.40061	48.489365
581600.097034	6822236.06166	1.397521	48.489568
581570.544058	6822304.199413	1.397102	48.490175
581621.838177	6822338.514632	1.397787	48.490493
581631.862765	6822363.32443	1.397915	48.490718
581454.435434	6822244.946673	1.395547	48.489621
581387.485823	6822187.494572	1.394657	48.489092
581411.124266	6822146.932305	1.394988	48.488732
581485.89259	6822110.501199	1.39601	48.488418
581579.500562	6822150.053098	1.397266	48.488791
581581.124061	6822163.504226	1.397284	48.488912
581613.076397	6822039.553269	1.39775	48.487803
581676.766376	6822093.309209	1.398597	48.488298
581046.253639	6822122.219855	1.390058	48.488443
581049.858602	6822118.86334	1.390108	48.488413
581096.535201	6822086.869902	1.390748	48.488134
580907.149641	6822172.669397	1.388162	48.488871
580862.628551	6822183.325599	1.387557	48.488959
581509.40601	6822377.237816	1.396255	48.490821
581511.055272	6822389.505553	1.396274	48.490932
581531.74734	6822445.131127	1.396538	48.491436
581547.647227	6822483.194414	1.396743	48.491781
581586.81635	6822581.229164	1.397246	48.49267
581587.528418	6822581.823131	1.397256	48.492675
581589.35911	6822591.449694	1.397278	48.492762
581394.247951	6822788.135694	1.394583	48.494496
581618.807626	6822746.52173	1.397634	48.494162
581618.153492	6822742.368697	1.397626	48.494125
581360.733867	6823031.865835	1.394063	48.496682
581364.1048	6823040.466552	1.394106	48.49676
581406.961594	6823066.733215	1.394679	48.497004
581442.531892	6823056.633535	1.395163	48.496919
581752.254092	6823690.474686	1.39918	48.502677
581738.722552	6823755.548105	1.398979	48.50326
581743.091824	6823734.936666	1.399044	48.503075
581899.664793	6823881.665473	1.401123	48.504423
581732.439178	6823895.230911	1.398856	48.504515
581734.540589	6823895.636123	1.398884	48.504519
581750.678011	6823930.696537	1.399093	48.504837
581774.911371	6823978.376034	1.399408	48.50527
581680.099148	6823924.064105	1.39814	48.504765
581629.83075	6823939.596938	1.397455	48.504895
581597.78799	6823852.318737	1.397045	48.504104
581575.885208	6823730.725825	1.396782	48.503007
581621.982309	6823787.25392	1.397391	48.503523
581720.667268	6823650.996105	1.398764	48.502316
578283.438296	6823935.052717	1.352164	48.504235
578304.713947	6823924.784169	1.352455	48.504146
578301.113916	6823972.771254	1.352393	48.504577
578251.925202	6823859.27008	1.351759	48.503547
578348.455887	6823738.647972	1.3531	48.50248
578354.03633	6823745.792628	1.353173	48.502546
578240.460727	6824082.863925	1.351541	48.505556
578186.67278	6824123.063048	1.350802	48.505907
578189.680301	6823998.724865	1.350877	48.50479
578199.937855	6823971.251465	1.351024	48.504545
578049.512477	6824274.036289	1.348902	48.50724
578036.080273	6824308.080848	1.348711	48.507543
578218.493165	6824393.569745	1.351156	48.508346
578161.625316	6824355.558246	1.350397	48.507994
578311.115653	6824468.35481	1.352388	48.509036
578223.528388	6824508.950367	1.351191	48.509385
578131.388517	6824561.564106	1.349929	48.509841
578055.529265	6824620.374163	1.348886	48.510356
578024.763249	6824520.495584	1.348498	48.509451
578015.245275	6824479.336333	1.348381	48.50908
578022.611097	6824483.626626	1.348479	48.509119
578044.842903	6824498.174904	1.348776	48.509255
578046.755815	6824501.396372	1.348801	48.509284
578008.536137	6824373.231691	1.34832	48.508124
579362.173532	6823277.404224	1.366949	48.498521
579357.870379	6823274.185474	1.366891	48.498492
579638.001458	6822951.051104	1.370773	48.495637
584263.259145	6820266.29312	1.434084	48.472332
583996.484989	6820387.527579	1.430443	48.473375
583445.028398	6820718.293137	1.422894	48.476251
582400.938759	6822372.717383	1.408319	48.490943
583952.976967	6822374.347035	1.42932	48.491237
583974.077382	6822367.914165	1.429607	48.491183
583971.420571	6822349.254335	1.429576	48.491015
583969.047258	6822241.775509	1.429573	48.490047
584012.388508	6822206.144293	1.430169	48.489735
584015.554569	6822203.369722	1.430213	48.48971
584033.546875	6822190.747953	1.430459	48.4896
584131.42945	6822120.614033	1.431803	48.488987
584133.142787	6822035.970137	1.431849	48.488226
584131.510865	6822033.964206	1.431827	48.488207
584178.456614	6822138.244528	1.432434	48.489154
584178.186521	6822144.296984	1.432429	48.489208
584104.641829	6822205.345334	1.431418	48.489744
584032.452427	6822192.718494	1.430444	48.489618
583979.945497	6822184.87104	1.429736	48.489538
584035.892231	6822081.554029	1.430521	48.488618
584064.547304	6822336.417239	1.43084	48.490916
584124.961807	6822369.769934	1.431648	48.491227
584216.732016	6822295.771609	1.43291	48.490577
584231.179997	6822285.90462	1.433108	48.490491
584246.498385	6822283.679641	1.433316	48.490474
584267.498999	6822278.735352	1.433601	48.490433
584282.194551	6822271.976692	1.433802	48.490375
584287.140888	6822268.691339	1.43387	48.490346
584288.517982	6822106.081224	1.433932	48.488884
584252.067733	6821968.376086	1.433476	48.487639
584215.170604	6821958.678772	1.432979	48.487545
584215.876925	6821958.683284	1.432989	48.487545
583084.016564	6824816.178835	1.416899	48.513043
583181.561806	6824803.404809	1.418223	48.512946
583441.766012	6824858.317662	1.421731	48.513486
583496.427037	6824839.68581	1.422476	48.513329
583606.274018	6824770.064587	1.423981	48.512722
583672.125143	6824704.269472	1.424891	48.512142
583315.399271	6824910.115536	1.420006	48.51393
583251.596777	6824938.457005	1.419135	48.514173
583152.933947	6824937.684636	1.417799	48.514148
583131.653828	6825001.063541	1.417494	48.514714
583125.041684	6825003.256092	1.417404	48.514733
582995.155206	6825110.471014	1.415616	48.515674
582949.866724	6825267.29591	1.414961	48.517076
582959.805014	6825419.402009	1.415054	48.518446
582961.606806	6825423.720606	1.415077	48.518485
582889.779362	6825324.342361	1.414132	48.517578
582838.262814	6825270.831617	1.413449	48.517088
582808.791306	6825206.747952	1.413067	48.516506
582774.422959	6825228.023613	1.412596	48.516691
582748.243917	6825314.468642	1.412218	48.517464
582754.434376	6825311.033291	1.412303	48.517434
582219.917939	6827317.207125	1.404518	48.535381
582248.63747	6827377.007745	1.40489	48.535924
582050.446438	6827469.69351	1.402181	48.536721
582033.951199	6827477.285439	1.401956	48.536786
581990.036086	6827491.483018	1.401357	48.536906
581986.774002	6827486.88228	1.401314	48.536864
581697.331645	6827511.491671	1.397387	48.537033
581687.194712	6827540.495068	1.397242	48.537292
581694.551216	6827462.637878	1.397363	48.536593
581691.932779	6827408.953419	1.397342	48.53611
581696.65762	6827383.463493	1.397413	48.535881
581698.903442	6827360.547235	1.39745	48.535675
581702.156278	6827330.834277	1.397502	48.535409
581700.856055	6827323.497581	1.397487	48.535343
581696.3426	6827296.592239	1.397433	48.5351
581696.022594	6827293.933322	1.397429	48.535076
581697.532815	6827288.757155	1.397451	48.53503
581698.393294	6827264.676856	1.39747	48.534813
581697.083306	6827213.547932	1.397466	48.534353
581701.365826	6827197.057769	1.397528	48.534206
581765.59634	6827061.103438	1.398436	48.532994
581813.507427	6827025.268346	1.399094	48.532681
581702.446484	6827130.755771	1.397561	48.533609
581692.542603	6827170.975001	1.397416	48.533969
581210.560532	6826850.508254	1.390977	48.530999
581199.682183	6826845.204569	1.390832	48.530949
581156.806476	6826824.922122	1.390257	48.530759
581156.547545	6826824.667964	1.390253	48.530757
581148.526116	6826819.843531	1.390146	48.530712
580931.872079	6826530.940701	1.387292	48.528074
580947.851456	6826517.417016	1.387512	48.527955
581042.692939	6826416.786758	1.388824	48.527067
581096.496848	6826204.544966	1.389611	48.525168
581093.513784	6826180.913742	1.389577	48.524955
581127.263425	6826297.428776	1.390002	48.526009
581163.676407	6826249.799443	1.390508	48.525588
580858.409293	6826525.600653	1.386299	48.528012
580811.450998	6826502.30328	1.385669	48.527794
580806.955228	6826501.619985	1.385609	48.527787
580725.959005	6826463.036233	1.384523	48.527425
580707.929194	6826458.920628	1.38428	48.527385
580703.697395	6826457.515471	1.384223	48.527371
580697.265855	6826455.411	1.384136	48.527351
580676.630116	6826446.459677	1.383859	48.527267
580814.689461	6827716.743607	1.385377	48.538717
580875.648242	6827752.665013	1.386193	48.539051
580879.690584	6827760.893706	1.386245	48.539126
580726.105456	6828063.181201	1.384081	48.541816
580755.792127	6828110.363121	1.38447	48.542246
580818.283087	6828100.652949	1.385319	48.54217
580835.340842	6828052.035957	1.385564	48.541736
580834.574794	6828051.492591	1.385553	48.541731
580834.510605	6828050.168907	1.385553	48.541719
580832.410021	6828005.254663	1.385537	48.541315
580863.177151	6827957.895578	1.385967	48.540895
580856.778394	6828126.211288	1.385834	48.542407
581017.108554	6828238.30288	1.387974	48.543445
581005.60848	6828261.532113	1.387812	48.543652
581053.56569	6828248.07211	1.388465	48.54354
581090.216662	6828156.961841	1.388987	48.542727
581170.024498	6828076.319101	1.39009	48.542016
581189.356295	6828059.867485	1.390356	48.541872
581027.166367	6828074.397193	1.388156	48.541973
580983.357127	6828295.256628	1.387501	48.543951
580993.109075	6828294.60962	1.387633	48.543947
581026.136486	6828335.856416	1.388069	48.544324
580994.589586	6828419.221872	1.387619	48.545068
580849.476271	6828416.772971	1.385654	48.545019
580719.673019	6828443.380471	1.383889	48.545235
580717.378759	6828448.897307	1.383856	48.545284
580627.689169	6828435.294143	1.382645	48.545145
585268.823963	6826864.497878	1.445929	48.531856
585321.874056	6826772.886861	1.446672	48.531041
585730.579629	6826937.905333	1.452163	48.532598
585463.950639	6826959.232773	1.448546	48.532742
585797.921067	6826819.074572	1.453106	48.531541
585831.575508	6826687.36453	1.453597	48.530362
578371.987246	6824571.053512	1.353183	48.509971
578430.060017	6824456.441479	1.354002	48.508952
578430.187663	6824456.028045	1.354004	48.508948
579149.062472	6827335.394046	1.362926	48.534979
579829.925575	6827849.232636	1.372003	48.539727
578217.244439	6827346.336629	1.350304	48.534903
578175.83094	6827391.3503	1.34973	48.5353
578173.648576	6827394.425816	1.3497	48.535327
578135.326068	6827446.327594	1.349166	48.535787
577963.230558	6827752.783242	1.346749	48.53851
575318.519928	6826936.453966	1.311168	48.530665
575279.961589	6826936.710594	1.310645	48.53066
575280.321959	6826940.24551	1.310649	48.530692
575282.812808	6826889.73372	1.310698	48.530238
575221.887894	6826796.217592	1.3099	48.529385
575196.893362	6827105.900334	1.309472	48.532166
575196.57657	6827104.977447	1.309468	48.532157
575132.468183	6827174.87749	1.308579	48.532774
575107.596578	6827208.906367	1.308232	48.533075
575099.551239	6827241.317692	1.308114	48.533365
575096.949632	6827250.469405	1.308076	48.533447
575094.317724	6827279.0059	1.308032	48.533703
574003.637006	6827450.547792	1.293212	48.535034
574011.07848	6827439.743512	1.293316	48.534939
574064.668259	6827833.340211	1.293927	48.538489
573968.6669	6827857.567249	1.29262	48.538688
573946.697289	6827900.847846	1.292309	48.539073
573662.586526	6828389.440651	1.288318	48.543412
573669.252509	6828394.046481	1.288407	48.543455
573754.237934	6828382.54954	1.289562	48.543368
573707.161246	6828420.216502	1.288913	48.543697
573574.267496	6828386.649018	1.287123	48.54337
573566.627029	6828369.224905	1.287024	48.543211
572860.190353	6828092.967225	1.277538	48.540589
572773.671041	6828012.802258	1.27639	48.539851
572764.680593	6828001.842322	1.276271	48.53975
572744.649281	6827977.579737	1.276007	48.539528
572770.331828	6827899.533947	1.276378	48.538831
572830.395287	6827887.829651	1.277195	48.538738
572647.663274	6827663.574914	1.274787	48.536685
572596.245635	6827602.860902	1.274108	48.536129
572597.460052	6827603.776392	1.274124	48.536138
572718.926169	6827988.272284	1.275656	48.539619
573133.006612	6826282.593467	1.281766	48.52436
573132.944934	6826281.748529	1.281766	48.524353
570868.130087	6827342.180925	1.250784	48.533443
570748.522734	6827434.743166	1.249137	48.534251
570748.316436	6827437.159987	1.249133	48.534273
570747.154243	6827450.065491	1.249113	48.534389
570747.479013	6827457.180748	1.249116	48.534453
570414.191475	6827402.938059	1.244619	48.533898
570410.142901	6827399.859105	1.244565	48.53387
570764.611876	6827327.932536	1.249386	48.533294
570764.524882	6827326.23879	1.249386	48.533279
570781.73303	6827310.349078	1.249624	48.533139
570790.916692	6827294.624957	1.249753	48.533
570799.980441	6827278.227095	1.24988	48.532854
570815.610186	6827243.062187	1.250103	48.532541
570854.953749	6827075.192798	1.250686	48.531039
570863.894274	6827059.088136	1.250812	48.530896
570657.99144	6826910.861042	1.248068	48.529522
570587.847244	6826877.849791	1.247128	48.529211
570631.307601	6826881.675527	1.247715	48.529254
570598.961132	6826849.23377	1.247287	48.528956
570461.792434	6826722.603508	1.245468	48.527789
570490.07082	6826852.733228	1.245812	48.528965
570474.883677	6826867.114803	1.245602	48.529092
570839.308167	6828592.54994	1.250018	48.544682
571072.177549	6828674.703863	1.253148	48.545467
570775.908352	6828605.430077	1.249156	48.544785
570871.612693	6829345.374127	1.25023	48.551459
570865.285834	6829368.126769	1.250137	48.551662
570850.372305	6829443.435703	1.249913	48.552336
570831.781618	6829708.130322	1.249581	48.554713
570817.233374	6829716.131439	1.249382	48.554782
570783.194623	6829745.864637	1.248912	48.555043
570781.558312	6829747.961103	1.248889	48.555061
570698.312675	6829750.348623	1.247761	48.555066
570680.416597	6829687.797808	1.247537	48.5545
570660.823208	6829595.904903	1.247299	48.55367
570791.474717	6829585.793727	1.249072	48.553605
570806.938367	6829631.061811	1.249268	48.554015
570806.179509	6829632.551955	1.249257	48.554028
570787.743101	6829627.061378	1.249009	48.553975
570716.251467	6829775.53435	1.247996	48.555296
570796.055581	6829841.724965	1.249057	48.555908
570830.58818	6829848.807634	1.249523	48.555978
570301.829166	6830058.860808	1.242296	48.557762
570248.760272	6830028.420156	1.241587	48.557477
570121.647312	6830006.403861	1.239871	48.557254
570121.912496	6830007.197929	1.239875	48.557261
570209.97586	6829842.703423	1.241117	48.555799
570203.609792	6829831.333579	1.241034	48.555696
570152.706879	6829764.664233	1.240365	48.555086
573926.844839	6828852.884103	1.291762	48.547631
573925.55905	6829132.911639	1.291662	48.55015
574050.421779	6829543.107675	1.293233	48.553863
573955.292342	6829295.770087	1.292017	48.55162
574226.535658	6829369.370571	1.29567	48.552335
574141.61131	6829146.164188	1.294585	48.550311
574763.423949	6828381.155093	1.303231	48.543551
574680.018494	6828292.64871	1.302127	48.542739
572139.934194	6830688.673542	1.267012	48.563791
572138.27621	6830688.950856	1.266989	48.563793
572137.550547	6830690.551299	1.266979	48.563808
571202.835386	6831222.565178	1.254154	48.568407
571157.423253	6831268.55715	1.253525	48.568811
571136.258959	6831281.262985	1.253235	48.568922
571108.026359	6831301.031755	1.252846	48.569094
570997.156086	6831015.321881	1.25143	48.566502
570997.056436	6831001.32591	1.251432	48.566376
571006.785948	6831262.989635	1.251486	48.568731
570999.738692	6831265.422123	1.251389	48.568752
570909.09722	6831288.696433	1.250154	48.568943
570900.125074	6831287.721575	1.250033	48.568933
570757.357198	6831510.232604	1.248031	48.570905
570650.335195	6831630.966652	1.246545	48.57197
570710.840394	6831762.251452	1.247325	48.573162
570703.020041	6831809.229091	1.247205	48.573583
570738.728933	6831710.093323	1.247719	48.572699
570765.174538	6831566.503071	1.24812	48.571413
570977.71074	6831392.422134	1.251053	48.56989
571013.343901	6831422.807633	1.251527	48.57017
571594.596251	6831580.283464	1.259356	48.571702
571609.706817	6831584.209717	1.25956	48.57174
570788.729317	6831794.035907	1.248371	48.573464
570764.381011	6831845.148481	1.248026	48.573919
570726.638993	6831911.406175	1.247494	48.574507
570632.115741	6832064.867151	1.246167	48.575868
570418.384998	6831931.016605	1.243311	48.574622
570419.398435	6831942.65416	1.243321	48.574726
570478.778817	6832130.591478	1.244069	48.576429
570501.228394	6832118.039824	1.244377	48.57632
570543.123713	6832204.001703	1.244919	48.577102
570350.827863	6832345.532639	1.24227	48.578336
570335.808943	6832295.955457	1.242082	48.577887
570378.56352	6832402.412836	1.242629	48.578853
570376.376573	6832417.241333	1.242595	48.578986
570375.479361	6832419.435807	1.242582	48.579005
570375.084387	6832421.699409	1.242576	48.579026
570368.038383	6832445.50088	1.242474	48.579238
570367.431096	6832499.339519	1.242449	48.579722
570301.762063	6832490.741628	1.241562	48.579632
570282.372209	6832529.063644	1.241287	48.579973
570121.53172	6832530.767751	1.239107	48.579956
570257.404378	6832701.900065	1.240897	48.581522
570178.868151	6832769.945202	1.239812	48.582118
570131.90656	6832760.246501	1.239178	48.582022
570203.854399	6832815.009633	1.240137	48.582529
570163.600432	6832867.320034	1.239575	48.582991
570190.73576	6832873.98605	1.239941	48.583056
570177.87814	6832911.934371	1.239755	48.583395
570173.570639	6832926.476705	1.239693	48.583525
570153.197035	6833101.593213	1.239363	48.585096
570232.688748	6833119.323698	1.240436	48.585271
570249.378987	6833488.653618	1.24055	48.588596
570457.270421	6833119.74665	1.24348	48.58532
570456.664889	6833103.923866	1.243476	48.585177
570443.058963	6833084.384173	1.243298	48.584999
570433.090374	6833059.914163	1.24317	48.584777
570377.401188	6832941.370218	1.242451	48.5837
570415.216618	6832871.679338	1.242984	48.58308
570421.625142	6832873.427061	1.243071	48.583097
570434.569298	6832857.648733	1.243251	48.582958
570523.423793	6832848.626731	1.244458	48.582895
570558.847071	6832880.694607	1.244929	48.58319
570511.783307	6832904.147124	1.244284	48.583392
570518.850798	6832851.832653	1.244395	48.582923
570619.153187	6832891.579722	1.245743	48.5833
570783.32218	6832805.982528	1.247994	48.582563
570807.283882	6832825.163458	1.248313	48.582741
570571.955581	6832684.215817	1.245165	48.581426
570586.02459	6832660.567351	1.245363	48.581216
570579.77344	6832670.352559	1.245276	48.581303
570511.189291	6832557.62628	1.24438	48.580275
570558.540343	6832549.762751	1.245024	48.580214
570713.660542	6832381.811398	1.247177	48.578735
570743.77862	6832379.586056	1.247586	48.578721
570785.026894	6832423.810001	1.248132	48.579127
570803.620972	6832345.096978	1.248407	48.578422
570811.359917	6832342.689012	1.248513	48.578402
570848.415914	6832316.131385	1.249023	48.578171
570891.215089	6832300.906017	1.249608	48.578043
570622.153097	6832327.139986	1.245953	48.578225
570615.346928	6832163.048721	1.24591	48.576748
579670.535838	6829543.623186	1.36937	48.554936
578467.41105	6831049.629163	1.352645	48.568256
578129.118572	6831062.569196	1.348057	48.568308
577629.580904	6830800.406097	1.341363	48.565856
577584.052969	6830605.828774	1.340801	48.564098
577621.835579	6830543.335812	1.341331	48.563543
577520.600443	6830703.66169	1.339914	48.564966
577519.242344	6830697.911357	1.339897	48.564914
577517.82639	6830698.827577	1.339877	48.564922
577517.027191	6830699.943946	1.339866	48.564932
577382.871755	6830933.184121	1.337982	48.567004
577336.651492	6831006.274691	1.337335	48.567652
577315.511585	6831036.349564	1.33704	48.567919
577301.978042	6830970.592643	1.336875	48.567325
577257.333449	6830969.278537	1.336271	48.567305
577228.140851	6830958.008574	1.335878	48.567198
577190.67539	6830937.511259	1.335376	48.567006
577187.141126	6830936.822876	1.335329	48.567
577167.405478	6830922.580195	1.335065	48.566868
577161.204001	6830915.971494	1.334983	48.566807
577140.712464	6830889.943029	1.334713	48.566569
577121.175462	6830868.425582	1.334454	48.566372
577109.066773	6830841.299968	1.334298	48.566126
577140.760658	6830756.443509	1.334752	48.565369
577201.505859	6830739.4289	1.33558	48.565227
577122.409773	6830673.294486	1.334527	48.564617
577115.70222	6830668.802986	1.334437	48.564576
577101.086173	6830658.897126	1.334242	48.564484
577024.713731	6830572.725987	1.333232	48.563694
577023.916083	6830573.329673	1.333221	48.5637
577177.687285	6830649.229294	1.335283	48.564411
577179.407765	6830641.931564	1.335308	48.564346
577432.57323	6830697.115211	1.338723	48.56489
577435.53375	6830699.048194	1.338762	48.564908
577550.149574	6830791.308283	1.340289	48.56576
577214.01682	6830599.897213	1.335789	48.563975
577211.408674	6830600.594633	1.335754	48.56398
577144.339042	6830580.0237	1.334851	48.563783
577139.746734	6830576.692141	1.334789	48.563752
577046.801345	6830503.132321	1.333551	48.563073
577075.852296	6830435.751577	1.333964	48.562472
577075.943668	6830435.972033	1.333965	48.562474
577075.132059	6830438.849261	1.333953	48.5625
577071.498895	6830444.331089	1.333903	48.562548
577065.660995	6830450.869441	1.333822	48.562606
577028.774218	6830495.479241	1.333309	48.563
576940.290023	6830440.541146	1.332126	48.562489
576906.388289	6830426.428761	1.331671	48.562356
576779.384833	6830400.979243	1.329957	48.562103
576793.04453	6830342.502981	1.330159	48.56158
576727.811211	6830256.084731	1.3293	48.56079
576605.517885	6830668.954001	1.327524	48.56448
576794.4409	6830641.042473	1.330092	48.564265
576851.023375	6830684.301179	1.330846	48.564665
576895.072095	6830714.964086	1.331435	48.564949
576814.812706	6830519.702614	1.330403	48.563177
576798.248885	6830465.426765	1.330194	48.562686
576157.143879	6830451.547677	1.321512	48.562439
576133.897779	6830481.594358	1.321188	48.562705
576120.339113	6830494.762455	1.321	48.562821
576107.986027	6830509.918761	1.320829	48.562955
576106.230873	6830511.747522	1.320804	48.562971
576028.767995	6830614.367508	1.319725	48.563879
576028.240813	6830614.304599	1.319718	48.563878
575969.432976	6830594.111796	1.318927	48.563685
575882.295601	6830463.167081	1.317784	48.562491
576030.526746	6830606.901808	1.319751	48.563812
576029.767966	6830777.904148	1.319692	48.56535
575939.946359	6830669.158348	1.318506	48.564355
575913.049811	6830676.143355	1.318139	48.564412
574900.075501	6831971.722675	1.304037	48.575869
574992.566951	6832011.752422	1.305279	48.576247
575097.605682	6832097.060774	1.306677	48.577034
575225.69195	6832272.768988	1.308362	48.578639
575128.392454	6832330.105722	1.307027	48.579136
575274.751832	6832381.315222	1.308996	48.579625
575369.333712	6832411.097874	1.310269	48.579911
575416.36816	6832424.277926	1.310903	48.580039
575519.315273	6832416.139817	1.3123	48.579985
575200.003356	6832383.923632	1.307982	48.579634
575185.94184	6832522.76992	1.307751	48.58088
575184.38142	6832528.153048	1.307728	48.580928
575106.522287	6832490.882823	1.306684	48.580578
575076.787894	6832511.00744	1.306275	48.580753
575105.894529	6832492.171933	1.306675	48.580589
575052.736063	6832580.661651	1.305929	48.581375
575047.321496	6832581.651948	1.305855	48.581383
574734.730455	6832570.978448	1.301621	48.581226
574695.929121	6832568.551566	1.301096	48.581197
573577.071581	6832440.778308	1.285969	48.57983
573880.055756	6832761.711136	1.289981	48.582776
573218.181234	6834023.908223	1.280637	48.593998
573153.772877	6834093.218249	1.279743	48.594608
573095.550386	6834156.664497	1.278935	48.595167
572921.274825	6834178.529475	1.276566	48.59533
572912.642085	6834175.036088	1.27645	48.595297
571922.133488	6833652.899438	1.263177	48.590406
571906.650626	6833652.87559	1.262967	48.590403
571896.195138	6833651.18441	1.262826	48.590385
571831.835959	6833649.499748	1.261954	48.590357
571813.171984	6833654.114505	1.261699	48.590395
571807.540388	6833655.010702	1.261623	48.590402
571796.566216	6833656.444624	1.261474	48.590413
571795.20203	6833656.829876	1.261455	48.590416
571767.766298	6833663.772306	1.261081	48.590473
571713.047106	6833602.62431	1.260357	48.589912
571721.501875	6833578.045821	1.260479	48.589693
571732.028702	6833547.037168	1.260631	48.589416
571745.068761	6833492.572502	1.260824	48.588929
571744.718792	6833404.268642	1.260846	48.588135
571745.155321	6833396.299219	1.260854	48.588063
571742.175431	6833349.165102	1.260828	48.587639
571743.151646	6833391.796662	1.260829	48.588022
571739.953883	6833757.737616	1.260676	48.591313
571767.413602	6833870.36494	1.261014	48.592331
571771.432687	6833881.881032	1.261066	48.592435
571777.379524	6833983.173883	1.261116	48.593347
571776.251852	6833976.051235	1.261103	48.593283
571777.468583	6833986.659178	1.261116	48.593379
571825.219334	6834015.105702	1.261755	48.593644
571785.231722	6834040.174659	1.261205	48.593862
571790.24994	6834080.224752	1.261261	48.594223
571809.159268	6834145.779004	1.261498	48.594816
571649.311362	6833669.922318	1.259473	48.590505
571605.207416	6833673.263909	1.258874	48.590526
571597.491349	6833766.63853	1.258742	48.591364
570487.864476	6832435.659378	1.244101	48.579174
571361.643922	6833430.838725	1.255645	48.588298
571470.518868	6833591.037564	1.257073	48.58976
571479.999782	6833596.178061	1.2572	48.589808
571583.944064	6833581.600303	1.258614	48.589698
571573.431685	6833513.718113	1.258491	48.589085
571573.784389	6833510.924242	1.258497	48.58906
571572.539274	6833490.920889	1.258486	48.58888
571572.556277	6833490.85565	1.258486	48.588879
571575.415362	6833526.004816	1.258515	48.589196
571599.518319	6833785.092638	1.258764	48.591531
571599.136739	6833786.855492	1.258758	48.591547
571598.153415	6833791.603041	1.258743	48.591589
571597.607582	6833794.614303	1.258735	48.591616
571581.857339	6833645.09944	1.258566	48.590268
571571.617908	6833641.439601	1.258429	48.590233
571481.464288	6833700.327755	1.257189	48.590745
571141.744785	6834433.518941	1.252363	48.597271
571123.071058	6834297.937893	1.252151	48.596048
572203.207691	6830780.931965	1.267841	48.564633
572333.640167	6830722.199863	1.269626	48.564131
572484.14374	6830864.696939	1.271623	48.565442
572484.97664	6830865.154368	1.271634	48.565446
572487.340897	6830866.622262	1.271666	48.56546
572488.790307	6830867.279317	1.271685	48.565466
572525.539727	6831071.28513	1.272123	48.567308
574529.464508	6833580.393553	1.298544	48.590264
575062.828634	6833758.112953	1.305723	48.591966
575067.344883	6833760.551908	1.305784	48.591989
575104.801838	6833775.621364	1.306287	48.592131
575110.58399	6833778.274118	1.306365	48.592156
575133.742472	6833787.405034	1.306676	48.592243
575170.915313	6833907.742879	1.307145	48.593332
575158.193501	6833950.795035	1.30696	48.593717
575156.475231	6833956.295904	1.306935	48.593766
575137.940433	6834014.552134	1.306667	48.594287
575364.614942	6833691.370461	1.309834	48.591424
576573.975058	6832667.449228	1.326523	48.582447
576513.215281	6832628.222719	1.325711	48.582083
576506.548487	6832624.404367	1.325621	48.582047
576334.652587	6832458.061775	1.323339	48.580518
576337.322312	6832460.886851	1.323375	48.580544
576474.835006	6832443.837335	1.325243	48.580417
576479.012752	6832443.71165	1.3253	48.580417
576540.00829	6832431.542773	1.32613	48.580319
576545.150322	6832430.229159	1.3262	48.580308
576662.760891	6832316.707055	1.327827	48.57931
576709.028935	6832502.65298	1.328401	48.580991
576687.401352	6832498.468598	1.328109	48.580949
576673.516674	6832560.88286	1.327903	48.581508
576597.737693	6832525.840671	1.326886	48.581178
576569.209619	6832511.187054	1.326503	48.581041
576735.198473	6832607.760775	1.328725	48.581941
576754.67353	6832657.228216	1.328975	48.58239
576775.552577	6832722.504963	1.329239	48.582981
576827.328338	6832471.619037	1.330013	48.580734
576970.36951	6832521.563437	1.331938	48.581211
[truncated: 1,835 more rows]
